1

2 **Structural basis for effector transmembrane domain recognition by**  
3 **type VI secretion system chaperones**

4

5 Shehryar Ahmad<sup>1,2</sup>, Kara K. Tsang<sup>1,2†</sup>, Kartik Sachar<sup>3†</sup>, Dennis Quentin<sup>4</sup>, Tahmid M.  
6 Tashin<sup>1,2</sup>, Nathan P. Bullen<sup>1,2</sup>, Stefan Raunser<sup>4</sup>, Andrew G. McArthur<sup>1,2,5</sup>, Gerd Prehna<sup>3\*</sup>,  
7 and John C. Whitney<sup>1,2,5\*</sup>

8

9

10

11 <sup>1</sup>Michael DeGroote Institute for Infectious Disease Research, McMaster University,  
12 Hamilton, ON, L8S 4K1, Canada

13 <sup>2</sup>Department of Biochemistry and Biomedical Sciences, McMaster University, Hamilton,  
14 ON, L8S 4K1, Canada

15 <sup>3</sup>Department of Microbiology, University of Manitoba, Winnipeg, Manitoba R3T 2N2,  
16 Canada

17 <sup>4</sup>Department of Structural Biochemistry, Max Planck Institute of Molecular Physiology,  
18 Otto-Hahn-Strasse 11, 44227, Dortmund, Germany

19 <sup>5</sup>David Braley Centre for Antibiotic Discovery, McMaster University, Hamilton, ON, L8S  
20 4K1, Canada

21

22

23

24

25

26

27

28

29

30

31

32 † These authors contributed equally to this work.

33

34 \* To whom correspondence should be addressed: G.P. or J.C.W.

35 Email – [gerd.prehna@umanitoba.ca](mailto:gerd.prehna@umanitoba.ca) or [jwhitney@mcmaster.ca](mailto:jwhitney@mcmaster.ca)

36 Telephone – (+1) 905-525-9140

1 **Abstract**

2 Type VI secretion systems facilitate the delivery of antibacterial effector proteins between  
3 neighbouring Gram-negative bacteria. A subset of these effectors harbor N-terminal  
4 transmembrane domains (TMDs) implicated in effector translocation across the target cell  
5 membrane. However, the abundance and distribution of these TMD-containing effectors  
6 has remained unknown. Here we report the discovery of prePAAR, a conserved motif  
7 found in over 6,000 putative TMD-containing effectors. Based on their differing sizes and  
8 number of TMDs these effectors fall into two distinct classes that are unified by their  
9 requirement for a member of the Eag family of T6SS chaperones for export. Co-crystal  
10 structures of class I and class II effector TMD-chaperone complexes from *Salmonella*  
11 *Typhimurium* and *Pseudomonas aeruginosa*, respectively, reveals that Eag chaperones  
12 mimic transmembrane helical packing to stabilize effector TMDs. In addition to  
13 participating in the chaperone-TMD interface, we find that prePAAR functions to facilitate  
14 proper folding of the downstream PAAR domain, which is required for effector interaction  
15 with the T6SS spike. Taken together, our findings define the mechanism of chaperone-  
16 assisted secretion of a widespread family of T6SS membrane protein effectors.  
17

## 1 Introduction

2 Bacteria secrete proteins to facilitate interactions with their surrounding  
3 environment. In Gram-negative bacteria, the transport of proteins across cellular  
4 membranes often requires the use of specialized secretion apparatuses found within the cell  
5 envelope. One such pathway is the type VI secretion system (T6SS), which in many  
6 bacterial species functions to deliver antibacterial effector proteins from the cytoplasm  
7 directly into an adjacent bacterial cell via a one-step secretion event (Russell et al., 2011).  
8 A critical step that precedes type VI secretion is the selective recruitment of effectors to  
9 the T6SS apparatus. Recent work has shown that for many effectors this process requires  
10 chaperone proteins, which are thought to maintain effectors in a ‘secretion-competent’ state  
11 (Unterweger et al., 2017). However, to-date, no molecular-level evidence exists to support  
12 this idea.

13 The T6SS is comprised of two main components: a cell envelope-spanning  
14 membrane complex and a cytoplasmic bacteriophage tail-like complex. The latter contains  
15 a tube structure formed by many stacked copies of hexameric ring-shaped hemolysin co-  
16 regulated protein (Hcp) capped by a single homotrimer of valine-glycine repeat protein G  
17 (VgrG)(Mougous et al., 2006, Spinola-Amilibia et al., 2016). Together, these proteins form  
18 an assembly that resembles the tail-tube and spike components of contractile bacteriophage  
19 (Renault et al., 2018). Additionally, VgrG proteins interact with a single copy of a cone-  
20 shaped proline-alanine-alanine-arginine (PAAR) domain-containing protein that forms the  
21 tip of the VgrG spike (Shneider et al., 2013). Altogether, PAAR, Hcp and VgrG are  
22 necessary for T6SS function, and during a secretion event these components are themselves  
23 delivered into target cells (Cianfanelli et al., 2016a). Prior to its export from the cell, the  
24 bacteriophage tail-like complex is loaded with toxic effector proteins. In contrast to  
25 proteins that are exported by the general secretory pathway, T6SS effectors do not contain  
26 linear signal sequences that facilitate their recognition by the T6SS apparatus. Instead,  
27 effectors transit the T6SS via physical association with Hcp, VgrG or PAAR proteins  
28 (Cianfanelli et al., 2016b).

29 In addition to its role in effector export, Hcp also possesses chaperone-like  
30 properties that facilitate cytoplasmic accumulation of Hcp-interacting effectors prior to  
31 their secretion (Silverman et al., 2013). This chaperone activity has been attributed to the  
32 interior of the ~4 nm pore formed by hexameric Hcp rings, which are wide enough to  
33 accommodate small, single-domain effectors. Individual Hcp rings appear to possess  
34 affinity towards multiple unrelated effectors. However, the molecular basis for this  
35 promiscuous substrate recognition is unknown.

36 In contrast to their Hcp-associated counterparts, VgrG-linked effectors are typically  
37 comprised of multiple domains and often require effector-specific chaperones for stability  
38 and/or to facilitate their interaction with the VgrG spike. Thus far, three effector-specific  
39 chaperone families belonging to the DUF1795, DUF2169 and DUF4123 protein families  
40 have been described. Studies on representative DUF2169 and DUF4123 proteins indicate  
41 that these chaperones minimally form ternary complexes with their cognate effector and a  
42 PAAR protein to facilitate the ‘loading’ of the PAAR domain and effector onto their  
43 cognate VgrG (Bondage et al., 2016, Burkinshaw et al., 2018). In contrast, DUF1795  
44 proteins, also known as Effector associated gene (Eag) chaperones, interact with so-called  
45 ‘evolved’ PAAR proteins in which the PAAR and toxin domains are found as a single  
46 polypeptide chain (Whitney et al., 2015, Alcoforado Diniz and Coulthurst, 2015).

1 Biochemical characterization of the Eag chaperone EagT6 from *P. aeruginosa* found that  
2 this chaperone interacts with TMDs found in the N-terminal loading and translocation  
3 region (NLTR) of its associated effector, Tse6 (Quentin et al., 2018). In the presence of  
4 lipid vesicles, Tse6 spontaneously inserts into membranes causing EagT6 chaperones to be  
5 released suggesting that EagT6 maintains the N-terminal TMDs in a pre-insertion state  
6 prior to toxin domain delivery across the inner membrane of target bacteria. However, it is  
7 not known whether the ‘solubilization’ of TMDs in aqueous environments represents a  
8 general role for Eag chaperones and if so, it is unclear how they maintain effector TMDs  
9 in a pre-insertion state.

10 In this work, we report the identification of prePAAR, a highly conserved motif  
11 that enabled the identification of over 6,000 putative T6SS effectors, all of which possess  
12 N-terminal TMDs and co-occur in genomes with Eag chaperones. Further informatics  
13 analyses found that these candidate effectors can be categorized into one of two broadly  
14 defined classes. Class I effectors belong to the Rhs family of proteins, are comprised of  
15 ~1200 amino acids and possess a single region of N-terminal TMDs. Class II effectors are  
16 ~450 amino acids in length and possess two regions of N-terminal TMDs. We validate our  
17 informatics approach by showing that a representative member of each effector class  
18 requires a cognate Eag chaperone for T6SS-dependent delivery into susceptible bacteria.  
19 Crystal structures of Eag chaperones in complex with the TMDs of cognate class I and  
20 class II effectors reveal the conformation of effector TMDs prior to their secretion and  
21 insertion into target cell membranes. In addition to participating in chaperone-effector  
22 interactions, structure-guided mutagenesis of hydrophilic residues within prePAAR show  
23 that this motif also catalyzes the appropriate folding of the downstream PAAR domain,  
24 enabling its interaction with its cognate VgrG. Collectively, our data provide the first high-  
25 resolution structural snapshots of T6SS effector-chaperone interactions and define the  
26 molecular determinants for effector TMD stabilization and recruitment to the T6SS  
27 apparatus.

## 28 29 **prePAAR is a motif found in TMD-containing effectors that interact with Eag** 30 **chaperones**

31 Characterization of Eag chaperones and their associated effectors has thus far been  
32 limited to the EagT6-Tse6 and EagR1-RhsA chaperone-effector pairs from *P. aeruginosa*  
33 and *Serratia marcescens*, respectively (Cianfanelli et al., 2016a, Whitney et al., 2015). In  
34 both cases, the chaperone gene is found upstream of genes encoding its cognate effector  
35 and an immunity protein that protects the toxin-producing bacterium from self-intoxication  
36 (Figure 1A). We previously showed that EagT6 interacts with the N-terminal TMDs of  
37 Tse6, an observation that led us to hypothesize a general role for Eag chaperones in  
38 ‘solubilizing’ hydrophobic TMDs of effectors in the aqueous environment of the cytoplasm  
39 so they can be loaded into the T6SS apparatus (Figure 1B) (Quentin et al., 2018). However,  
40 evidence supporting this general role is lacking because homology-based searches for  
41 additional Eag chaperones can yield difficult to interpret results due to a scarcity of  
42 conserved residues and homology of this protein family to the phage protein DcrB  
43 (Samsonov et al., 2002), which is widely distributed in both T6SS-positive and T6SS-  
44 negative organisms. Similarly, the identification of N-terminal TMD-containing PAAR  
45 effectors that might require Eag chaperones is also challenging because many PAAR



1 domain-containing effectors lack TMDs (Shneider et al., 2013), and aside from being  
2 comprised of hydrophobic residues, the TMDs themselves are poorly conserved.

3 In an attempt to overcome the challenges associated with identifying Eag-  
4 interacting T6SS effectors, we used *jackhmmmer* to generate a sequence alignment hidden  
5 Markov model (HMM) for the N-terminal 60 residues of Tse6 using an iterative search  
6 procedure that queried the UniProtKB database (Johnson et al., 2010). We reasoned that if  
7 there exists a molecular signature present in effector proteins indicative of Eag chaperone  
8 association, it would be located within this region of Tse6 homologous proteins because it  
9 contains a known chaperone binding site. Remarkably, the HMM we obtained revealed a  
10 nearly invariant AARxxDxxxH motif, which in Tse6 is found in the first 15 residues of the  
11 protein and is immediately N-terminal to its first TMD (Figure 1C). In total, our query  
12 identified over 2,054 proteins containing this motif (Table 1 and Figure 1—figure  
13 supplement 1A). Among these candidate effectors, our search identified the recently  
14 characterized toxins Tre1, Tas1, DddA as well as many toxins of unknown function  
15 indicating that our approach may have identified T6SS effectors with novel biochemical  
16 activities (Ting et al., 2018, Ahmad et al., 2019, Mok et al., 2020). Interestingly, prior to  
17 any knowledge of PAAR domains or Eag chaperones being involved in T6SS function,  
18 Zhang and colleagues noted the existence of this N-terminal motif in an informatics  
19 analysis of bacterial nucleic acid degrading toxins (Zhang et al., 2011). Here, they refer to  
20 it as prePAAR because PAAR sequences were found C-terminal to the motif. We have  
21 adhered to this name because as described in detail below, this pattern holds true for the  
22 thousands of candidate effectors identified in our search.

23 Examination of our putative effector sequences revealed that prePAAR is  
24 substantially enriched in bacterial genera with characterized T6SSs including  
25 *Pseudomonas*, *Burkholderia*, *Salmonella*, *Shigella*, *Escherichia*, *Enterobacter*, *Yersinia*,  
26 and *Serratia*. Interestingly, no prePAAR motifs were identified in *Vibrio* despite an  
27 abundance of species within this genus possessing highly active bacteria-targeting T6SSs.  
28 We next obtained all 56,324 available genomes from NCBI for the abovementioned genera  
29 and found that 26,327 genomes encode at least one prePAAR motif. After removing all  
30 redundant sequences, 6,129 unique prePAAR-containing proteins present across 5,584  
31 genomes were used for further analyses (Table 2, ‘unfiltered’ dataset). In these genomes,  
32 we determined that approximately 90% encode a single prePAAR motif, although instances  
33 where prePAAR is present up to six times within a single genome were also identified  
34 (Figure 1D). To determine if these unique proteins are probable TMD-containing T6SS  
35 effectors that require Eag chaperones for secretion, we next examined each prePAAR-  
36 containing protein and its associated genome for the following three criteria: 1) the  
37 existence of an Eag chaperone encoded in the same genome, 2) the presence of a  
38 downstream PAAR domain and 3) predicted TMDs in the first 300 amino acids of the  
39 protein (Krogh et al., 2001, Kall et al., 2007). The location restriction in our TMD search  
40 was used in order to exclude C-terminal toxin domains that possess TMDs, which differ  
41 from N-terminal translocation TMDs in that they may not require chaperones for secretion  
42 (Mariano et al., 2019). We searched each genome for Eag proteins using an HMM for  
43 DUF1795 and found that 99.5% (5,554/5,584) of prePAAR-containing genomes also  
44 possessed at least one *eag* gene (Jones et al., 2014). In approximately 14% of the 5,554  
45 genomes analyzed, the number of prePAAR motifs matched the number of Eag  
46 homologues. In the remainder of cases, the number of Eag homologous proteins exceeded

1 the number of prePAAR motifs, with a weighted average of 2.5 paralogues per genome.  
2 As is the case with *eagT6-tse6* and *eagRI-rhsA*, ~90% of the identified prePAAR-  
3 containing effector genes appear directly beside an *eag* gene whereas the remaining ~10%  
4 are found in isolation suggesting that their putative chaperone is encoded elsewhere in the  
5 genome. We removed pre-PAAR-containing protein fragments (proteins less than 100  
6 amino acids in length) and further reduced redundancy by clustering sequences with 95%  
7 identity. Remarkably, in all but two of the remaining 1,166 prePAAR-containing proteins,  
8 we identified a PAAR domain, indicating a probable functional relationship between  
9 prePAAR and PAAR. The two prePAAR-containing proteins lacking a PAAR domain  
10 were either adjacent to a gene encoding a PAAR domain-containing protein or directly  
11 beside T6SS structural genes. Finally, we searched 1,166 prePAAR-containing proteins for  
12 TMDs and found that all protein sequences contained predicted TMDs with 86% having  
13 one region of TMDs and 14% having two regions of TMDs. In sum, our prePAAR-based  
14 search procedure identified thousands of candidate effector proteins possessing properties  
15 consistent with the requirement for an Eag chaperone for T6SS-dependent export.

16 To further analyze our collection of prePAAR-containing effectors, we built a  
17 phylogenetic tree from 1,166 non-redundant effector sequences that represent the diversity  
18 present in our collection of sequences (Fig. 1E). Interestingly, two distinct sizes of proteins  
19 emerged from this analysis: large prePAAR effectors that are over 1000 amino acids in  
20 length and small prePAAR effectors comprised of 350-450 amino acids (Figure 1E and  
21 Figure 1—figure supplement 1B). As noted previously, all effectors contained predicted  
22 TMDs; however, large effectors almost exclusively contained a single region of TMDs N-  
23 terminal to their PAAR domain whereas most small effectors contained TMD regions N-  
24 and C-terminal to their PAAR domain. To distinguish between these two domain  
25 architectures, we hereafter refer to large, single TMD region-containing prePAAR  
26 effectors as class I and small, two TMD region-containing prePAAR effectors as class II.  
27 Notably, class I effectors also contain numerous YD repeat sequences, which are a  
28 hallmark of rearrangement hotspot (Rhs) proteins that function to encapsulate secreted  
29 toxins (Figure 1F)(Busby et al., 2013). Conversely, class II effectors are distinguished by  
30 a GxxxxGxxLxGxxxD motif in addition to their second TMD region.

31 As a first step towards validating our informatics approach for identifying Eag  
32 chaperone-effector pairs, we assessed the ability of several newly identified Eag  
33 chaperones to interact with the prePAAR-containing effector encoded in the same genome.  
34 We previously demonstrated that the class II effector Tse6 interacts with EagT6 and we  
35 similarly found that when expressed in *E. coli*, Eag chaperones from *Enterobacter cloacae*,  
36 *Salmonella* Typhimurium, *Shigella flexneri* and *Serratia proteamaculans* co-purified with  
37 their predicted cognate effector (Figure 1G and Figure 1—figure supplement 1C).  
38 Collectively, these findings indicate that prePAAR proteins constitute two classes of TMD-  
39 containing T6SS effectors and that representative members from both classes interact with  
40 Eag chaperones.

41

## 42 **Eag chaperones are specific for cognate prePAAR effectors**

43 We next sought to examine the specificity of Eag chaperones towards prePAAR  
44 effectors in a biologically relevant context. To accomplish this, we inspected our list of  
45 prePAAR effectors and found that the soil bacterium *Pseudomonas protegens* Pf-5  
46 possesses both a class I and class II effector, encoded by the previously described effector

1 genes *rhsA* and *tne2*, respectively (Tang et al., 2018). Furthermore, the genome of this  
2 bacterium encodes two putative Eag chaperones, PFL\_6095 and PFL\_6099, which have  
3 25% sequence identity between them (Figure 2A). PFL\_6095 is found upstream of *rhsA*  
4 and is likely co-transcribed with this effector whereas PFL\_6099 is not found next to either  
5 effector gene. To examine the relationship between these genes, we generated strains  
6 bearing single deletions in each effector and chaperone gene and conducted intraspecific  
7 growth competition assays against *P. protegens* recipient strains lacking the *rhsA-rhsI* or  
8 *tne2-tni2* effector-immunity pairs. We noted that protein secretion by the T6SS of *P.*  
9 *protegens* is substantially inhibited by the threonine phosphorylation pathway, so we  
10 additionally inactivated the threonine phosphatase encoding gene *pppA* in recipients to  
11 induce a ‘tit-for-tat’ counterattack by wild-type donor cells (Figure 2—figure supplement  
12 1A-B)(Mougous et al., 2007, Basler et al., 2013). Consistent with the effector-immunity  
13 paradigm for bacteria-targeting T6SSs, wild-type *P. protegens* readily outcompeted  $\Delta rhsA$   
14  $\Delta rhsI \Delta pppA$  and  $\Delta tne2 \Delta tni2 \Delta pppA$  strains in a *rhsA*- and *tne2*-dependent manner,  
15 respectively (Figure 2B). Additionally, we found that a strain lacking PFL\_6095 no longer  
16 exhibited a co-culture fitness advantage versus a  $\Delta rhsA \Delta rhsI \Delta pppA$  recipient but could  
17 still outcompete *tne2* sensitive recipients to the same extent as the wild-type strain.  
18 Conversely, a  $\Delta PFL_6099$  strain outcompeted  $\Delta rhsA \Delta rhsI \Delta pppA$  but not  $\Delta tne2$   
19  $\Delta tni2 \Delta pppA$  recipients. Together, these data indicate that the delivery of RhsA and Tne2  
20 into susceptible target cells requires effector-specific *eag* genes.

21 To test the ability of PFL\_6095 and PFL\_6099 to act as RhsA- and Tne2-specific  
22 chaperones, respectively, we co-expressed each chaperone-effector pair in *E. coli* and  
23 examined intracellular effector levels by western blot. Consistent with functioning to  
24 promote cognate effector stability, accumulation of RhsA only occurred in the presence of  
25 PFL\_6095 whereas Tne2 accumulated in cells containing PFL\_6099 (Figure 2C). We next  
26 examined the stability-enhancing properties of PFL\_6095 and PFL\_6099 when expressed  
27 at native levels in *P. protegens*. Due to challenges associated with detecting RhsA and Tne2  
28 in unconcentrated cell lysates, we constructed chromosomally encoded N-terminal  
29 decahistidine-tagged ( $his_{10}$ ) fusions of RhsA and Tne2 to facilitate the enrichment of these  
30 proteins from *P. protegens* and confirmed that these fusions did not compromise the ability  
31 of these effectors to intoxicate recipients (Figure 3—figure supplement 1A-B). Following  
32 affinity purification, RhsA and Tne2 levels were assessed using RhsA and vesicular  
33 stomatitis virus glycoprotein epitope (VSV-G) antibodies, respectively. In line with our  
34 data in *E. coli*, we were unable to detect RhsA in the absence of PFL\_6095 whereas Tne2  
35 was absent in a strain lacking PFL\_6099 (Figure 2D). Collectively, these data suggest that  
36 Eag chaperones exhibit a high degree of specificity for their cognate effectors. Based on  
37 our characterization of these genes, we propose to rename PFL\_6095 and PFL\_6099 to  
38 *eagR1* and *eagT2*, respectively, to reflect their newfound role as chaperones for the  
39 prePAAR-containing effectors RhsA and Tne2.

40 Previous biochemical studies on the class II prePAAR effector Tse6 and its cognate  
41 chaperone EagT6 demonstrated that the two TMD regions of this effector each require an  
42 EagT6 chaperone for stability (Quentin et al., 2018). These findings suggest that there may  
43 exist a physical limitation to the number of TMDs that a single EagT6 chaperone can  
44 stabilize. Our finding that class I prePAAR effectors contain only one TMD region suggests  
45 that these proteins may only possess one Eag interaction site (Figure 3A). To test this, we  
46 constructed a RhsA variant lacking its N-terminal region (RhsA $_{\Delta NT}$ ) and co-expressed this

1 truncated protein with EagR1 in *E. coli*. Consistent with our hypothesis, affinity  
2 purification of RhsA<sub>ΔNT</sub> showed that this truncated variant does not co-purify with EagR1  
3 (Figure 3B). Additionally, expression of the 74 residue N-terminal fragment of RhsA in  
4 isolation was sufficient for EagR1 binding (Figure 3—figure supplement 1C). Our data  
5 also demonstrate that in contrast to wild-type RhsA, RhsA<sub>ΔNT</sub> is stable in the absence of  
6 EagR1 when expressed in *E. coli* indicating that the N-terminus imparts instability on the  
7 protein in the absence of its cognate chaperone. In *P. protegens*, we could readily detect  
8 *rhsA*<sub>ΔNT</sub> in a strain lacking *eagR1*, corroborating our findings in *E. coli* (Figure 3C).  
9 However, despite the enhanced stability of chaperone ‘blind’ RhsA<sub>ΔNT</sub>, a *P. protegens*  
10 strain expressing this truncation was no longer able to outcompete RhsA-sensitive recipient  
11 cells demonstrating an essential role for the chaperone-bound N-terminus during  
12 interbacterial competition (Figure 3D).

13 After ruling out the possibility that truncating the N-terminus of RhsA affects the  
14 growth-inhibitory activity of its C-terminal toxin domain (Figure 3—figure supplement  
15 1D), we next examined the ability of RhsA<sub>ΔNT</sub> to interact with its cognate secreted  
16 structural component of the T6SS apparatus. T6SS effectors encoded downstream of *vgrG*  
17 genes typically rely on the encoded VgrG protein for delivery into target cells (Whitney et  
18 al., 2014). Consistent with this pattern, PFL\_6094 encodes a predicted VgrG protein, herein  
19 named VgrG1, which we confirmed is required for RhsA-mediated growth inhibition of  
20 susceptible target cells (Figure 3—figure supplement 1E). Furthermore, using a *P.*  
21 *protegens* strain expressing His<sub>10</sub>-tagged RhsA and FLAG-tagged VgrG1 from their native  
22 loci, we found that these proteins physically interact to form a complex (Figure 3E). To  
23 test if the absence of the chaperone-bound N-terminus affects the formation of this  
24 complex, we used our *E. coli* co-expression system to purify RhsA-EagR1-VgrG1  
25 complexes. These experiments show that RhsA<sub>ΔNT</sub> is not able to interact with VgrG1, even  
26 though this truncated protein possesses its PAAR domain, which in T6SS effectors lacking  
27 prePAAR and TMDs in their N-terminus, is sufficient for VgrG interaction (Figure 3—  
28 figure supplement 1F)(Bondage et al., 2016).

29 To gain insight into how EagR1 binding facilitates RhsA interaction with VgrG1,  
30 we next performed negative-stain electron microscopy (EM) to examine the configuration  
31 of each subunit within this complex. To facilitate the accurate identification of each  
32 component, we obtained class averages of purified VgrG1, RhsA<sub>ΔNT</sub>, RhsA-EagR1  
33 complex and RhsA-EagR1-VgrG1 complex (Figure 4—figure supplement 1A-H). As  
34 expected, isolated VgrG1 and RhsA<sub>ΔNT</sub> proteins appeared as characteristic spike- and  
35 barrel-shaped proteins, respectively (Spinola-Amilibia et al., 2016, Busby et al., 2013);  
36 Figures 3F and 3G). Intriguingly, images of RhsA-EagR1 complexes contained a sphere-  
37 shaped object that likely represents a subcomplex between EagR1 and the N-terminus of  
38 RhsA (Figure 3H). Lastly, the class-averages of RhsA-EagR1-VgrG1 complexes revealed  
39 a close association of EagR1 and RhsA with the tip of the VgrG spike, which is likely  
40 mediated by the PAAR domain of RhsA (Figure 3I). Interestingly, though both complexes  
41 exhibit significant rotational flexibility, the average distance between the subcomplex  
42 formed by EagR1 and the N-terminus of RhsA is substantially greater in the absence of  
43 VgrG1 (average distance: 2.68 nm, *n* = 27 classes versus 1.20 nm, *n* = 26 classes) (Figure  
44 4—figure supplement 1F-H). When taken together with our biochemical experiments,  
45 these structural data indicate that EagR1 stabilizes the N-terminus of RhsA, which may  
46 also orient the effector such that it can interact with its cognate VgrG.



1

## 2 **Eag chaperones bind effector TMDs by mimicking transmembrane helical packing**

3 In addition to a TMD-containing region, the N-terminus of prePAAR effectors also  
4 harbours the prePAAR motif itself. However, the negative stain EM images of RhsA-  
5 EagR1-VgrG1 particles presented herein and our previously determined single-particle  
6 cryo-EM structure of a complex containing Tse6-EagT6-VgrG1 are of insufficient  
7 resolution to resolve the structures of chaperone-bound effector TMDs or the prePAAR  
8 motif (Quentin et al., 2018). Therefore, to better understand the molecular basis for  
9 chaperone-TMD interactions and to gain insight into prePAAR function we initiated X-ray  
10 crystallographic studies on both class I and class II effector-chaperone complexes. Efforts  
11 to co-crystallize *P. protegens* EagR1 with the prePAAR and TMD-containing N-terminus  
12 of RhsA were unsuccessful. However, the EagR1 homologue SciW from *Salmonella*  
13 Typhimurium crystallized in isolation and in the presence of the N-terminus of the class I  
14 prePAAR effector Rhs1 (Rhs1<sub>NT</sub>), allowing us to determine apo and effector bound  
15 structures to resolutions of 1.7Å and 1.9Å, respectively (Figure 4 and Table 4). Similar to  
16 RhsA, we confirmed that a Rhs1<sub>ΔNT</sub> variant was unable to bind its cognate chaperone, SciW  
17 (Figure 3—figure supplement 1G). The structure of the EagT6 chaperone was previously  
18 solved as part of a structural genomics effort and we were additionally able to obtain a 2.6Å  
19 co-crystal structure of this chaperone in complex with the N-terminal prePAAR and first  
20 TMD region of the class II effector Tse6 (Tse6<sub>NT</sub>) (Figure 4 and Table 4).

21 The overall structure of SciW reveals a domain-swapped dimeric architecture that  
22 is similar to the previously described apo structure of *P. aeruginosa* EagT6 though each  
23 chaperone differs in its electrostatic surface properties (Figure 5—figure supplement 1A-  
24 D) (Whitney et al., 2015). A comparison of the chaperone structures in their apo and  
25 effector bound states shows that upon effector binding, both chaperones ‘grip’ the  
26 prePAAR-TMD region of their cognate effector in a claw-like manner (Figure 4A-D).  
27 Although our biochemical data indicate that Eag chaperones exhibit a high degree of  
28 specificity for their associated effector, the internal surface of the claw-shaped dimer  
29 contains a number of conserved residues that make critical interactions with the TM helices  
30 in both complexes (Figure 5A-F). For example, I22 and I24 of EagT6 create a hydrophobic  
31 surface in the ‘palm’ of the claw, which is flanked on either side by symmetrical  
32 hydrophobic surfaces comprised of A62, L66, L98, F104 and I113 (Figure 5B-D).  
33 Furthermore, the conserved hydrophilic residues S37, S41, Q58, and Q102 also interact  
34 with the bound effectors by making bifurcated hydrogen bonds to amide or carbonyl groups  
35 in the peptide backbone of the TM helices (Figure 5E and 5F). These polar interactions  
36 between chaperone and effector TM helices are striking because they are reminiscent of  
37 polar interactions seen within the helical packing of alpha helical transmembrane proteins,  
38 which often use serine and glutamine residues to mediate inter-helical interactions via  
39 bifurcated hydrogen bonds between side-chain and main-chain atoms (Dawson et al., 2002,  
40 Dawson et al., 2003, Adamian and Liang, 2002). Additionally, EagT6 and SciW provide  
41 ‘knob-hole-like’ interactions, which also feature prominently in membrane protein packing  
42 (Curran and Engelman, 2003). Knob-hole interactions involve a large hydrophobic residue  
43 on one TM helix acting as a ‘knob’ to fill the hole provided by a small residue such as  
44 glycine or alanine on another TM-helix. TM holes are typically created by GxxxG/A motifs  
45 such as those found in G19-A24 (Rhs1) and G25-A30 (Tse6). In this case, the conserved  
46 Eag chaperone residue L66 provides a knob for the A24/30 hole (Figure 5E and 5F). Given

1 that the Eag chaperone dimer creates a hydrophobic environment with complementary  
2 knob-hole interactions for its cognate effector TM helices, and interacts with TM helices  
3 via side-chain to main-chain hydrogen bonds, we conclude that Eag chaperones provide an  
4 environment that mimics transmembrane helical packing to stabilize prePAAR effector  
5 TMDs in the cytoplasm prior to effector export from the cell.

### 6 7 **prePAAR facilitates PAAR domain folding and interaction with the VgrG spike**

8 We next compared the conformation of the bound prePAAR-TMD fragments  
9 between our effector-chaperone co-crystal structures. Interestingly, despite the  
10 abovementioned similarities between the SciW and EagT6 structures, the conformation of  
11 the N-terminal fragment of their bound prePAAR effector differs significantly. In the SciW  
12 complex, Rhs1<sub>NT</sub> adopts an asymmetric binding mode whereby the effector fragment does  
13 not make equivalent molecular contacts with both chains of the two-fold symmetrical  
14 chaperone dimer (Figures 4A and 5F). The first TM helix (residues 19-33) binds to the  
15 hydrophobic cavity of one SciW protomer whereas the remaining hydrophobic region of  
16 Rhs1, which consists of two anti-parallel alpha-helices connected by a short  $3_{10}$  helix,  
17 occupies the remainder of the binding surface. Phenylalanine residues F20 and F43 likely  
18 play an important role in the asymmetric binding of Rhs1 to SciW because their  
19 hydrophobic side chains insert into equivalent hydrophobic pockets found in each SciW  
20 protomer (Figure 5E). By contrast, Tse6<sub>NT</sub> exhibits a pseudosymmetric binding mode with  
21 EagT6 (Figure 4C and 5F). In this structure, two alpha-helices of Tse6 each occupy  
22 equivalent Eag binding pockets and run in the opposite direction to match the antiparallel  
23 arrangement of the EagT6 dimer. For example, A7 and A30 of Tse6 interact with  
24 equivalent sites in their respective chaperone protomers (Figures 4B and 5E). These two  
25 helices, which consist of prePAAR and a TM helix, flank a central TM helix whose C-  
26 terminus extends into the solvent, likely indicating the location of the downstream PAAR  
27 domain in the full-length effector.

28 A lack of interpretable electron density prevented modelling of Rhs1's entire  
29 AAR<sub>xxx</sub>D<sub>xxx</sub>H prePAAR motif in our Rhs1<sub>NT</sub>-SciW co-crystal structure. However, the  
30 D<sub>xxx</sub>H portion of this motif is part of a short  $3_{10}$  helix that orients the aspartate and histidine  
31 side chains such that they face outward into solvent (Figure 5—figure supplement 1E-G).  
32 By contrast, we were able to model the entire prePAAR motif of Tse6<sub>NT</sub> and in this case,  
33 the motif forms an alpha helix that binds the hydrophobic pocket of an EagT6 protomer. In  
34 this structure, the two conserved alanine residues of prePAAR make contact with the  
35 EagT6 chaperone whereas the arginine, aspartate and histidine residues are solvent exposed  
36 (Figure 4C and 5F). Remarkably, despite existing in different secondary structure elements,  
37 the D11 and H15 prePAAR residues of Tse6 are located in a similar 3D location as their  
38 D9 and H13 counterparts in Rhs1 (Figure 5G). It should be noted that the modelled  
39 conformation of Tse6<sub>NT</sub> appears to be locked into place by crystal packing suggesting that  
40 in solution, Tse6's prePAAR motif may exhibit significant conformational flexibility and  
41 can dissociate from EagT6 as is observed for the prePAAR motif of Rhs1 (Figure 5—figure  
42 supplement 1H-I). In support of this, we previously showed that addition of detergent  
43 disrupts the interaction between EagT6 and Tse6 suggesting that Eag chaperone-effector  
44 interactions are labile, likely because chaperone dissociation is required prior to effector  
45 delivery into target cells (Quentin et al., 2018). Intriguingly, docking our high resolution  
46 EagT6-Tse6<sub>NT</sub> crystal structure into our previously determined lower resolution Tse6-

1 EagT6-VgrG1 cryo-EM map orients the D11 and H15 prePAAR residues of Tse6 in a  
2 position that suggests they interact with its PAAR domain (Figure 5H). In sum, our  
3 structural analyses of prePAAR shows that this region is likely dynamic, and its mode of  
4 interaction varies for class I and class II prePAAR effectors. However, both Eag  
5 chaperones bind the N-terminus of their cognate effector such that the conserved aspartate  
6 and histidine residues of prePAAR are positioned to potentially be involved in interactions  
7 with the downstream PAAR domain, and thus may play a role in effector-VgrG  
8 interactions.

9 To test if prePAAR influences PAAR function, we next conducted mutagenesis  
10 analysis on Tse6 because its PAAR-dependent interaction with its cognate VgrG protein,  
11 VgrG1a, can be monitored *in vivo* by western blot. During denaturing electrophoresis, Tse6  
12 appears in two forms: 1) a high-molecular weight species corresponding to Tse6-VgrG1a  
13 complex and 2) a low-molecular weight species indicative of free Tse6 (Whitney et al.,  
14 2015). Deletion of *vgrG1a* only affects complex formation whereas deletion of the *eagT6*  
15 gene results in a substantial reduction in the levels of both species, which provides a means  
16 to differentiate residues involved in effector-chaperone versus effector-VgrG interactions  
17 (Quentin et al., 2018). Using this readout, we engineered *P. aeruginosa* strains expressing  
18 Tse6 D11A and H15A single amino acid substitutions and a D11A/H15A double  
19 substitution and examined the consequences of these prePAAR mutations on Tse6  
20 interactions. In support of a role in promoting proper folding of PAAR, Tse6-VgrG1a  
21 complex formation was substantially reduced in a strain expressing the Tse6<sup>D11A</sup> variant  
22 and abolished in a strain expressing Tse6<sup>D11A, H15A</sup> (Figure 6A). We next examined the  
23 effect of these mutations on T6SS-dependent delivery of Tse6 into target cells by  
24 subjecting these *P. aeruginosa* strains to growth competition assays against Tse6-sensitive  
25 recipients. In agreement with our biochemical data, strains expressing Tse6 harboring a  
26 D11A mutation exhibited a substantial reduction in co-culture fitness consistent with an  
27 inability of these mutant proteins to form a complex with VgrG1a (Fig. 6B).

28 To better understand why Tse6's PAAR domain requires prePAAR for function,  
29 we compared its sequence and predicted structure to the X-ray crystal structure of the  
30 'orphan' PAAR domain c1882 from *E. coli*, which does not contain additional components  
31 such as TMDs or a toxin domain (Shneider et al., 2013). Interestingly, this analysis  
32 suggested that the PAAR domain of Tse6 lacks an N-terminal segment, which, based on  
33 the structure of c1882, is likely important for the proper folding of this domain (Figure 6C).  
34 We next extended this structural analysis to include all PAAR domains of the prePAAR  
35 effectors that we experimentally confirmed bind Eag chaperones. In all cases, the N-  
36 terminal segment of each PAAR domain was missing (Figure 6—figure supplement 1A).  
37 We also noted that the prePAAR motif possesses significant sequence homology to the N-  
38 terminal segment of c1882, suggesting that even though this stretch of amino acids exists  
39 on the opposite side of the first TMD region of Tse6, it may comprise the missing segment  
40 of Tse6's PAAR domain (Figure 6D). Lending further support to this hypothesis, when we  
41 artificially fused Tse6's prePAAR motif (residues 1-16) with its PAAR domain (residues  
42 77-163) and generated a structural model. Strikingly, this analysis suggests that the first 16  
43 residues of Tse6 fill the missing structural elements of Tse6's PAAR domain (Figure 6E).  
44 To test if prePAAR interacts with PAAR as this model predicts, we next co-expressed  
45 Tse6<sup>NT</sup>-EagT6 complex with the Tse6's PAAR domain (residues 75-162) and examined  
46 the ability of these Tse6 fragments to co-purify with one another. In line with our



1 hypothesis, upon purification of Tse6<sub>NT</sub>-EagT6 complex, Tse6's PAAR domain was also  
2 present (Figure 6F). Taken together with our *in vivo* data, this observation suggests that  
3 interaction with prePAAR is critical for the folding and proper function of PAAR. Lending  
4 further support to this idea, co-incubation of Tse6, EagT6 and VgrG1a after overexpression  
5 in *E. coli* leads to the formation of SDS-resistant Tse6-VgrG1a complexes whereas doing  
6 so with a strain expressing Tse6<sup>D11A, H15A</sup> does not (Figures 6G and Figure 6—figure  
7 supplement 1E). Importantly, these mutations do not affect overall levels of Tse6 in cells  
8 or affect its ability to bind to EagT6, indicating that these mutations do not have a global  
9 destabilizing effect on Tse6 (Figure 6G). Together, these data suggest that the PAAR  
10 domains of prePAAR effectors exist as 'split PAAR' due to the presence of N-terminal  
11 TMDs.

12 In orphan PAAR proteins, such as c1882, DxxxH motifs are necessary for Zn<sup>2+</sup>-  
13 coordination and are therefore necessary for proper folding of this domain (Shneider et al.,  
14 2013). In agreement with this precedent, the conserved histidine residue in the DxxxH  
15 portion of Tse6's prePAAR motif is predicted to be in the same 3D position as the first  
16 zinc-coordinating histidine residue of c1882 (Figure 6—figure supplement 1B). To extend  
17 this comparison further, we conducted *in silico* analyses to examine potential Zn<sup>2+</sup>-binding  
18 residues in 564 orphan PAARs and 1,765 prePAAR effectors and found that while orphan  
19 PAAR proteins typically contain a total of four histidine and/or cysteine Zn<sup>2+</sup>-coordinating  
20 residues, prePAAR effectors only contain three in their PAAR domain with the fourth  
21 likely being provided by the prePAAR motif (Figure 6—figure supplement 1C). In support  
22 of this prediction, we found that Tse6-VgrG1a complexes formed by the D11A or H15A  
23 variants were susceptible to heat treatment under denaturing conditions whereas the wild-  
24 type complex remained intact (Figure 6—figure supplement 1D-E). Collectively, our  
25 experimental data and informatics analyses indicate that unlike orphan PAAR proteins,  
26 which contain all the necessary molecular determinants for proper folding, prePAAR  
27 effectors contain inherently unstable PAAR domains that require a prePAAR motif to  
28 ensure their proper folding thus enabling their interaction with their cognate VgrG protein  
29 (Figure 7).

30

## 31 Discussion

32 Protein secretion systems endow bacteria with a significant fitness advantage in  
33 their niche (Galan and Waksman, 2018). The proper functioning of these pathways requires  
34 the precise recruitment of effector proteins among hundreds of cytoplasmic proteins. Here,  
35 we use a combination of genetic, biochemical and structural approaches to investigate the  
36 mechanism of recruitment for a widespread family of membrane protein effectors exported  
37 by the T6SS. Our work demonstrates that the N-terminal region of these effectors possesses  
38 two structural elements that are critical for their delivery between bacterial cells by the  
39 T6SS apparatus. First, this region contains TMDs, which interact with the Eag family of  
40 chaperones and are proposed to play a role in effector translocation across the inner  
41 membrane of recipient cells (Quentin et al., 2018). Additionally, this region possesses  
42 prePAAR, which we show is required for the proper folding of PAAR, thereby facilitating  
43 the interaction of this domain with its cognate VgrG protein and enabling effector export  
44 by the T6SS.

45

## 46 The prePAAR motif is present in Eag-binding effectors

1 prePAAR effectors constitute a new family of T6SS effectors that are defined by  
2 the existence of a prePAAR motif, N-terminal TMDs, a PAAR domain and a C-terminal  
3 toxin domain. Most notably, we show that this group of effectors co-occurs with Eag  
4 chaperones and that chaperone interaction with prePAAR effector TMDs is a conserved  
5 property of this protein family. While previous work has relied on genetic context to  
6 identify the cognate effector of an Eag chaperone (Whitney et al., 2015, Alcoforado Diniz  
7 and Coulthurst, 2015), our use of the prePAAR motif as an effector discovery tool enables  
8 the identification of these effectors in any genetic context. Other families of chaperones,  
9 such as the DUF4123 or DUF2169 protein families, have also been shown to affect the  
10 stability and/or export of their cognate effectors (Burkinshaw et al., 2018, Bondage et al.,  
11 2016, Pei et al., 2020). However, little is known about the specificity of these chaperones  
12 for their effector targets, which do not contain predicted N-terminal TMDs. DUF4123  
13 chaperones are encoded next to effectors with diverse domain architectures and studies on  
14 several members of this family have shown chaperone interactions occur with domains of  
15 effectors possessing no apparent shared sequence properties (Liang et al., 2015). A lack of  
16 structural information for these and DUF2169 chaperones has hindered an understanding  
17 of why certain T6SS effectors require members of these chaperone families for export from  
18 the cell.

### 20 **Role of Eag chaperones in binding effector TMDs and prePAAR**

21 Our co-crystal structures show that Eag chaperones can exhibit distinct binding  
22 modes with the N-termini of their cognate effectors. The class I prePAAR effector Rhs1  
23 interacts with its cognate chaperone SciW in an asymmetric manner whereas the class II  
24 effector Tse6 adopts a pseudosymmetric binding mode whereby two separate alpha helices  
25 interact with each EagT6 chaperone protomer in a similar location. Our structural analyses  
26 suggest that Rhs1 residues F20 and F43 play a critical role in its asymmetric binding mode  
27 because the aromatic side chains of these amino acids insert into hydrophobic pockets  
28 present in SciW. These favourable chaperone-TMD interactions allow SciW to ‘shield’ the  
29 hydrophobic regions of Rhs1’s N-terminus from the aqueous milieu while also positioning  
30 its prePAAR motif in such a way that would allow it to interact with PAAR. By contrast,  
31 the pseudosymmetric binding mode of Tse6 to EagT6 appears to be much more dynamic  
32 as interpretable electron density for bound Tse6 was only observed when the effector  
33 fragment was held in place by interactions with an adjacent complex in the crystallographic  
34 asymmetric unit. Consequently, we speculate that even though the Tse6’s prePAAR motif  
35 appears less accessible than that of Rhs1, it is likely highly dynamic in solution and thus  
36 may adopt a markedly different conformation when in complex with PAAR.

37 Despite containing a primarily beta-sheet secondary structure, Eag chaperones  
38 interact with effector TMDs by mimicking the interactions that occur between the helices  
39 of alpha-helical membrane proteins, which, to our knowledge, is a unique mechanism for  
40 a chaperone-effector interaction. Upon binding their cognate effector, we hypothesize that  
41 Eag chaperones not only shield effector TMDs from solvent but also distort their structure  
42 to prevent potential hairpin formation and erroneous insertion into the inner membrane of  
43 the effector-producing cell. Because Eag-interacting TMDs have likely evolved to insert  
44 into bacterial membranes, a mechanism to prevent self-insertion is probably necessary prior  
45 to export. Recent work studying the secretion of TMD-containing effectors of the bacterial  
46 type III and type IV secretion systems found that shielding TMDs to prevent inner

1 membrane insertion is a critical step for proper targeting to the secretion apparatus  
2 (Krampen et al., 2018). However, membrane protein effectors of these secretion systems  
3 have evolved to target eukaryotic, not bacterial, membranes and thus may not require  
4 stringent control of TMD conformation prior to export. Indeed, unlike the Eag chaperones  
5 presented here, a previously studied T3SS chaperone was shown not to distort the  
6 conformation of effector TMDs, whose conformation remained similar before and after  
7 membrane insertion (Nguyen et al., 2015).

8 Current evidence also suggests that Eag chaperones are not secreted by the T6SS  
9 (Cianfanelli et al., 2016a, Quentin et al., 2018). This leads to two important questions: 1)  
10 when do Eag chaperones dissociate from their cognate effector? 2) How do effector TMDs  
11 remain stable after their dissociation from the chaperone? Although no definitive answers  
12 exist for either of these questions, given that effector-chaperone interactions are maintained  
13 after effector-VgrG complex formation, chaperone dissociation presumably occurs  
14 immediately before or during a T6SS firing event. One way this could be accomplished is  
15 through chaperone interactions with components of the T6SS membrane and/or baseplate  
16 subcomplexes, which might induce chaperone-effector dissociation. The lumen of the  
17 T6SS apparatus may also serve to mitigate the susceptibility to degradation observed for  
18 prePAAR effectors in the absence of Eag chaperones because the inner chamber of the  
19 T6SS apparatus may shield effectors from the protein homeostasis machinery of the cell.

## 20 21 **prePAAR-containing proteins contain C-terminal toxin domains that act in the** 22 **cytoplasm**

23 Studies conducted in several different bacteria suggest that many T6SSs export  
24 multiple effectors during a single firing event (Cianfanelli et al., 2016a, Silverman et al.,  
25 2013, Hood et al., 2010). The precise subcellular location for effector delivery in recipient  
26 cells is not well understood, however, it is noteworthy that many effectors that interact with  
27 Hcp or C-terminal extensions of VgrG target periplasmic structures such as peptidoglycan  
28 or membranes (Flaugnatti et al., 2016, Silverman et al., 2013, Brooks et al., 2013, LaCourse  
29 et al., 2018). In contrast, all characterized prePAAR proteins act on cytoplasmic targets by  
30 mechanisms that include the hydrolysis of NAD<sup>+</sup> and NADP<sup>+</sup>, ADP-ribosylation of FtsZ,  
31 pyrophosphorylation of ADP and ATP, and deamination of cytidine bases in double-  
32 stranded DNA (Whitney et al., 2015, Ting et al., 2018, Ahmad et al., 2019, Mok et al.,  
33 2020). This observation supports the proposal that the TMDs in prePAAR effectors  
34 function to promote toxin entry into the cytoplasm of target cells (Quentin et al., 2018).  
35 Two possibilities for how this occurs include a discrete toxin translocation event that takes  
36 place after the initial delivery of effectors into the target cell periplasm or that effectors are  
37 delivered directly into the target cell cytoplasm during a T6SS firing event. The large size  
38 of Rhs repeat-containing class I prePAAR effectors favours the latter model because it is  
39 unlikely that the 2-3 N-terminal TM helices found in these proteins could form a  
40 translocation pore for the C-terminal toxin domain. Instead, we propose that the TMDs of  
41 prePAAR effectors acts as molecular grease that coats the tip of the VgrG spike allowing  
42 it to effectively penetrate target cell membranes during a T6SS firing event. It should be  
43 noted that PAAR effectors with nuclease activity that lack N-terminal TMDs have been  
44 identified, suggesting that other cell entry mechanisms likely exist and future work may  
45 address whether these proteins have important motifs or domains that permit an alternative  
46 translocation mechanism into recipient cells (Pissaridou et al., 2018).

1

## 2 **prePAAR is required for proper PAAR folding and effector export by the T6SS**

3 Crystal structures of single domain PAAR proteins suggest that this domain folds  
4 independently and is highly modular (Shneider et al., 2013). Indeed in many instances,  
5 PAAR domains appear in isolation (orphan PAAR) and do not require additional binding  
6 partners to interact with VgrG (Wood et al., 2019). The initial characterization of PAAR  
7 domains established seven groups of PAAR proteins, with the most abundant being orphan  
8 PAARs (55% of 1353 PAAR proteins) while the remaining groups represent PAAR  
9 proteins with N- and/or C-terminal extensions (Shneider et al., 2013). Our data demonstrate  
10 that PAAR domains with N-terminal extensions possess prePAAR, which we show is  
11 required for the proper folding of the downstream PAAR domain. Based on our structural  
12 modelling and sequence alignments, the ability of prePAAR to assist with PAAR domain  
13 folding may in part be due to its participation in coordinating the zinc ion found near the  
14 tip of this cone-shaped protein. Our sequence analysis also suggests that while orphan  
15 PAARs contain four zinc-coordinating histidine and/or cysteine residues, the PAAR  
16 domain of prePAAR effectors contains only three, suggesting that the fourth ligand  
17 required for tetrahedrally coordinated  $Zn^{2+}$  is provided by prePAAR. In this way, the  
18 PAAR domain of prePAAR effectors is split into two components, which come together to  
19 form a structure that can interact with VgrG and undergo T6SS-mediated export. One  
20 consequence of this ‘split PAAR’ domain arrangement is that the TMDs are tethered to  
21 PAAR via their N- and C-terminus, which would restrict the mobility of the TMDs and  
22 ensure their positioning on the surface of PAAR. We speculate that the proper arrangement  
23 of prePAAR effector TMDs on the surface of PAAR is likely critical for the ability of the  
24 T6SS spike complex to effectively penetrate target cell membranes during a T6SS firing  
25 event. Future studies focused on capturing high-resolution structural snapshots of  
26 assembled prePAAR-TMD-PAAR complexes will be needed to further support this  
27 proposed mechanism.

28

## 29 **Conclusions**

30 In summary, our mechanistic dissection of prePAAR effectors and their cognate  
31 chaperones has revealed fundamental new insights into bacterial toxin export and  
32 membrane protein trafficking. The unique ability of T6SSs to potently target a wide range  
33 of bacteria in a contact-dependent manner may permit their use in different biomedical  
34 applications, such as the selective depletion of specific bacterial species in complex  
35 microbial communities (Ting et al., 2020). An in-depth understanding of the mechanisms  
36 that that underlie T6SS effector recruitment and delivery will be of critical importance for  
37 such future bioengineering efforts.

1 **Acknowledgements**

2 The authors would like to thank Jianhua Zhao for electron microscopy expertise, Sarah  
3 Trilesky and Matthew Walker for their assistance with cloning and protein purification and  
4 Peter Stogios, Seemay Chou, James Holton and Atanas Radkov for crystallography  
5 expertise. S.A. and K.K.T. were supported by Ontario Graduate Scholarships and A.G.M.  
6 holds a Cisco Research Chair in Bioinformatics. Part of the research described in this paper  
7 was performed using beamline 08ID-1 at the Canadian Light Source, a national research  
8 facility of the University of Saskatchewan, which is supported by the Canada Foundation  
9 for Innovation (CFI), the Natural Sciences and Engineering Research Council (NSERC),  
10 the National Research Council (NRC), the Canadian Institutes of Health Research (CIHR),  
11 the Government of Saskatchewan, and the University of Saskatchewan. This work was  
12 supported by the Max Planck Society (to S.R.) and by grants from CFI (34531 to A.G.M.  
13 and 37841 to G.P.), NSERC (RGPIN-2017-05350 to J.C.W. and RGPIN-2018-04968 to  
14 G.P.) and CIHR (PJT156129 to J.C.W. and PJT156214 to A.G.M.). Computer resources  
15 were supplied by the McMaster Service Lab and Repository computing cluster, funded in  
16 part by grants to A.G.M. from CFI and Compute Canada ([www.computecanada.ca](http://www.computecanada.ca)).  
17  
18

19 **Author Contributions**

20 Experiments were conceived and designed by S.A., G.P. and J.C.W. All cloning, strain  
21 generation, bacterial competition assays and biochemical experiments were conducted by  
22 S.A. Bioinformatics analyses were conducted by K.K.T. Protein crystallization, X-ray data  
23 collection and analysis was performed by K.S. and G.P. Negative-stain EM experiments  
24 were conducted by D.Q. Assistance with cloning and biochemical experiments was  
25 provided by T.M.T. Figure design, manuscript writing and editing were done by S.A., G.P.,  
26 J.C.W. The project was supervised by G.P. and J.C.W. Funding was provided by S.R.,  
27 A.G.M., G.P. and J.C.W.  
28



## 1 Experimental Procedures

2

### 3 Bacterial strains and growth conditions

4 *Pseudomonas* strains used in this study were derived from *P. aeruginosa* PAO1 and  
5 *P. protegens* Pf-5 (Table 5). Both organisms were grown in LB medium (10 g L<sup>-1</sup> NaCl,  
6 10 g L<sup>-1</sup> tryptone, and 5 g L<sup>-1</sup> yeast extract) at 37°C (*P. aeruginosa*) or 30°C (*P. protegens*).  
7 Solid media contained 1.5% or 3% agar. Media were supplemented with gentamicin (30  
8 µg mL<sup>-1</sup>) and IPTG (250 µM) as needed.

9 *Escherichia coli* strains XL-1 Blue, SM10 and BL21 (DE3) Gold or CodonPlus  
10 were used for plasmid maintenance and toxicity experiments, conjugative transfer and  
11 protein overexpression, respectively (Table 5). All *E. coli* strains were grown at 37°C in  
12 LB medium. Where appropriate, media were supplemented with 150 µg mL<sup>-1</sup> carbenicillin,  
13 50 µg mL<sup>-1</sup> kanamycin, 200 µg mL<sup>-1</sup> trimethoprim, 15 µg mL<sup>-1</sup> gentamicin, 0.25-1.0 mM  
14 isopropyl β-D-1-thiogalactopyranoside (IPTG), 0.1% (w/v) rhamnose or 40 µg mL<sup>-1</sup> X-gal.

15

### 16 Genomic analyses of effector sequences in UniProtKB

17 For the analysis of all effectors in UniprotKB we used six iterations of *jackhmmer*  
18 (HmmerWeb v2.41.1) using the first 60 amino acids of Tse6 (PA0093) protein to obtain  
19 2,378 sequences. We removed any UniProtKB deprecated sequences entries (324/2378,  
20 remaining: 2,054) and further filter, cluster, and analyze the remaining 975 effector  
21 sequences as stated below (same as analysis in Figure 1E). In our PAAR motif search,  
22 using our first to fourth PAAR motif HMMs (see analysis below), we identified 734/975,  
23 200/241, 30/41, and 8/11 sequences to respectively have PAAR motifs. The remaining 3  
24 sequences that did not have PAAR motifs were determined to either directly associated  
25 with a PAAR domain downstream. There were 7 sequences that did not have any  
26 predicted TM. All scripts and intermediate files can be found in:

27 [https://github.com/karatsang/effector\\_chaperone\\_T6SS/tree/master/UniProtKB](https://github.com/karatsang/effector_chaperone_T6SS/tree/master/UniProtKB)

28

### 29 Genomic analyses of effector sequences in T6SS-containing genera

30 The genome assemblies of *Pseudomonas*, *Burkholderia*, *Enterobacter*, *Escherichia*,  
31 *Salmonella*, *Serratia*, *Shigella*, *Vibrio* and *Yersinia* were downloaded from NCBI using  
32 ncbi-genome-download (<https://github.com/kblin/ncbi-genome-download>, v0.2.10).  
33 Protein coding genes were predicted using Prodigal (v2.6.3) and the `-e 1` option (Hyatt  
34 et al., 2010). We developed a Hidden Markov Model (HMM) for detecting effectors by  
35 using the first 61 amino acids of Tse6 (PA0093) protein and six iterations of *jackhmmer*  
36 (HmmerWeb v2.41.1). *hmmsearch* (v3.1b2) and the effector HMM were used to identify  
37 the effectors in all genome assemblies using the `-Z 45638612 -E 1000` options and we  
38 further filtered for a bitscore greater than 40. We further filtered to include effectors that  
39 included the prePAAR (AARxxDxxxH) motif, which we searched for using regular  
40 expressions, identifying 6,129 prePAAR-containing sequences across 5,584 genomes. To  
41 be included in the analysis of Figure 1D, each genome with at least one effector had to  
42 also encode for an Eag chaperone which we searched for using Pfam's established DcrB  
43 HMM (<http://pfam.xfam.org/family/PF08786#tabview=tab6>) and *hmmsearch* with the  
44 same parameter and bitscore cutoff as the effector search. For Figure 1E, to reduce  
45 spurious effector predictions, we removed sequences with less than 100 amino acids. To  
46 reduce redundancy, we removed any sequences that were 100% identical and clustered

1 sequences with 95% sequence similarity that were less than 50 amino acids different in  
2 length using CD-HIT (v4.8.1 with `-c 0.95 -n 5 -S 50``), leaving 1,166 sequences for  
3 further analysis (Li and Godzik, 2006). The numbers of sequences before and after  
4 filtering for the UniprotKB and sequences isolated from the 8 genera listed above are  
5 indicated in Table 3. We identified the presence of a PAAR domain through a repetitive  
6 process of generating a PAAR motif HMMs and using *hmmsearch* (as described above)  
7 to capture the known diversity of the PAAR motif. We started broadly by using Pfam's  
8 PAAR motif HMM (<http://pfam.xfam.org/family/PF05488#tabview=tab4>) to identify  
9 895/1166 PAAR motif containing sequences. For the 271 sequences that were predicted  
10 to not have a PAAR motif, we then generated an HMM using three iterations *jackhammer*  
11 and the PAAR motif of the Tse6 (PA0093) protein (L75 to G162) to identify 219/271  
12 PAAR motifs. We generated a third PAAR motif HMM using 60-160 amino acids of a  
13 randomly selected sequence (GCF\_001214785.1 in contig NZ\_CTBP01000066.1) and  
14 two iterations of *jackhammer* that was not identified to have a PAAR motif in the previous  
15 search but was identified to have a PAAR domain using phmmer (HmmerWeb version  
16 2.41.1). We identified 42/52 sequences had a PAAR domain using the third PAAR motif.  
17 For the fourth PAAR domain HMM, we used the 60-160 amino acid sequence of  
18 GCF\_005396085.1 in the NZ\_BGGV01000116 contig and three iterations of  
19 *jackhammer* to identify 8/10 sequences that had a PAAR motif. The remaining two  
20 sequences with no PAAR domain were manually analyzed and were determined to either  
21 be directly associated with a PAAR domain downstream (GCF\_001425105.1) or directly  
22 beside T6SS machinery gene (GCF\_001034685.1). We predicted the transmembrane  
23 (TM) helices in proteins first using TMHMM (v2.0), Phobius web server, and TMbase  
24 (<https://embnet.vital-it.ch/software/>) (Krogh et al., 2001, Kall et al., 2007). Using  
25 TMHMM, we defined a TM region to include TM helices that were less than or equal to  
26 25 amino acids apart. Therefore, any TM helix that was greater than 25 amino acids apart  
27 from another TM helix would be considered part of a new TM region. Any effector  
28 considered to have no TM or three TM regions were analyzed with Phobius with the  
29 same criteria as with TMHMM. Any effector considered to have no TM or three TM  
30 regions using Phobius, were analyzed with TMbase where we used the strongly preferred  
31 model and only interpreted TM helices with a score greater than 1450. In this model, any  
32 TM helices within the first 120 amino acids is one TM region and any number of TM  
33 helices between 200 and 300 amino acids were another region. MAFFT (v7.455) was  
34 used to align the sequences using the `--auto`` option and the alignment was then trimmed  
35 to remove gaps using trimAl (v1.4) and the `-gt 0.8 -cons 80`` options (Kato and  
36 Standley, 2013, Capella-Gutierrez et al., 2009). We constructed the maximum-likelihood  
37 phylogenetic tree using FastTree (v2.1.10) and the `-gamma`` option (Price et al., 2010).  
38 The phylogenetic tree was visualized using ggtree (Yu, 2020). For Figure 1—figure  
39 supplement 1B, we identified neighbouring (within 300 base pairs) chaperone sequences  
40 for the effectors in Figure 1E. We removed any effectors that did not have a chaperone  
41 and we categorized the chaperones with its corresponding effectors TM prediction.  
42 Sequence logos in Figure 1C and 1F were created by using logo maker (v0.8) (Tareen  
43 and Kinney, 2020). All scripts and intermediate files can be found in:  
44 [https://github.com/karatsang/effector\\_chaperone\\_T6SS/tree/master/NCBI\\_8\\_Genera](https://github.com/karatsang/effector_chaperone_T6SS/tree/master/NCBI_8_Genera).

45  
46 **Screening for potential Zn<sup>2+</sup>-binding residues**



1 To collect orphan PAAR sequences, we used the Pfam database's information on the  
2 PAAR motif (PF05488, <http://pfam.xfam.org/family/PF05488#tabview=tab1>) and only  
3 obtained the 1,923 sequences with one PAAR motif architecture. We then aligned and  
4 trimmed the alignment of the 1,923 orphan PAAR sequences. We then used the  
5 previously mentioned 2,054 effector sequences from UniProtKB and filtered to only use  
6 1765 sequences with an AARxxDxxxH motif. To identify Zn<sup>2+</sup>-binding residues in  
7 orphan and prePAAR effector sequence logos, we used logo maker (v0.8) to create  
8 sequence logos for the first 200 amino acids (Tareen and Kinney, 2020). All scripts and  
9 intermediate files can be found in:

10 [https://github.com/karatsang/effector\\_chaperone\\_T6SS/tree/master/ZnBindingResidues](https://github.com/karatsang/effector_chaperone_T6SS/tree/master/ZnBindingResidues)  
11

## 12 **DNA manipulation and plasmid construction**

13 Primers were synthesized and purified by Integrated DNA Technologies (IDT). Phusion  
14 polymerase, restriction enzymes and T4 DNA ligase were obtained from New England  
15 Biolabs (NEB). Sanger sequencing was performed by Genewiz Incorporated.

16 Plasmids used for heterologous expression were pETDuet-1, pET29b and  
17 pSCrhaB2-CV. Mutant constructs were made using splicing by overlap-extension PCR  
18 and standard restriction enzyme-based cloning procedures were subsequently used to ligate  
19 PCR products into the plasmid of interest.

20 In-frame chromosomal deletion mutants in *P. aeruginosa* and *P. protegens* were  
21 made using the pEXG2 plasmid as described previously (Hmelo et al., 2015). Briefly, 500-  
22 600 bp upstream and downstream of target gene were amplified by standard PCR and  
23 spliced together by overlap-extension PCR. The resulting DNA fragment was ligated into  
24 the pEXG2 allelic exchange vector using standard cloning procedures (Table 6). Deletion  
25 constructs were transformed into *E. coli* SM10 and subsequently introduced into *P.*  
26 *aeruginosa* or *P. protegens* via conjugal transfer. Merodiploids were directly plated on LB  
27 (lacking NaCl) containing 5% (w/v) sucrose for *sacB*-based counter-selection. Deletions  
28 were confirmed by colony PCR in strains that were resistant to sucrose, but sensitive to  
29 gentamicin. Chromosomal point mutations or tags were constructed similarly with the  
30 constructs harboring the mutation or tag cloned into pEXG2. Sucrose-resistant and  
31 gentamicin-sensitive colonies were confirmed to have the mutations of interest by Sanger  
32 sequencing of appropriate PCR amplicons.  
33

## 34 **Bacterial toxicity experiments**

35 We previously showed that a D1404A mutation was sufficient to attenuate, but not abolish,  
36 the toxicity of RhsA and allows for the cloning of this toxin in the absence of its immunity  
37 gene (Tang et al., 2018). Therefore, to assess the toxicity of the full-length effector and a  
38 truncated variant, we cloned RhsA<sup>D1404A</sup> or RhsA<sub>ΔNT</sub><sup>D1404A</sup> into the rhamnose-inducible  
39 pSCrhaB2-CV vector. These plasmids were co-transformed with an IPTG-inducible  
40 pPSV39 vector containing or lacking *EagR1*, respectively (see Table 6). Stationary-phase  
41 overnight cultures containing these plasmids were serially diluted 10<sup>-6</sup> in 10-fold  
42 increments and each dilution was spotted onto LB agar plates containing 0.1% (w/v) L-  
43 rhamnose, 250 μM IPTG, trimethoprim 250 μg mL<sup>-1</sup> and 15 μg mL<sup>-1</sup> gentamicin.  
44 Photographs were taken after overnight growth at 37°C.  
45

## 46 **Cell fraction preparation and secretion assays**

1 Stationary-phase overnight cultures of *E. coli* (DE3) BL21 CodonPlus, *P. aeruginosa*  $\Delta retS$   
2 or *P. protegens* were inoculated into 2 mL or 50 mL LB at a ratio of 1:500, respectively.  
3 Cultures were grown at 37 °C (*E. coli* and *P. aeruginosa*) or 30 °C (*P. protegens*) to OD  
4 0.6-0.8. Upon reaching the desired OD, all samples were centrifuged at 7, 600 x g for 3  
5 min. The secreted fraction in *P. aeruginosa* or *P. protegens* samples was prepared by  
6 isolating the supernatant and treating it with TCA (final conc: 10% (v/v)) as described  
7 previously (Quentin et al., 2018). The cell pellet was resuspended in 60  $\mu$ L PBS, treated  
8 with 4X laemmli SDS loading dye and subjected to boiling to denature and lyse cells. For  
9 experiments examining the stability of Tse6-VgrG1a complexes, *P. aeruginosa* cells were  
10 resuspended in 60  $\mu$ L PBS and subjected to six freeze-thaw cycles prior to mixing with 2X  
11 laemmli SDS loading dye. For preparation of *P. protegens* and *E. coli* cell fractions  
12 containing his-tagged complexes, cells were resuspended in lysis buffer containing 50 mM  
13 Tris-HCl (pH 8.0), 250 mM NaCl, 10 mM imidazole and purified according to the protocol  
14 described below (see *Protein expression and purification*).

### 15 16 **Competition assays**

17 A tetracycline-resistant, *lacZ*-expression cassette was inserted into a neutral phage  
18 attachment site (*attB*) of recipient *P. aeruginosa* and *P. protegens* strains to differentiate  
19 these strains from unlabeled donors. *P. protegens* recipient strains also contain a  $\Delta pppA$   
20 mutation to stimulate T6SS effector secretion to induce a T6SS ‘counterattack’ from *P.*  
21 *protegens* donor strains (Basler et al., 2013).

22 For intraspecific competitions between *P. aeruginosa* or *P. protegens* donors  
23 against isogenic recipient that lack the indicated effector-immunity pairs, stationary-phase  
24 overnight cultures were mixed in a 1:1 (v/v) ratio.

25 Initial ratios of donors:recipients were counted by plating part of the competition  
26 mixtures on LB agar containing 40  $\mu$ g mL<sup>-1</sup> X-gal. The remainder of each competition  
27 mixture was spotted (10  $\mu$ L per spot) in triplicate on a 0.45  $\mu$ m nitrocellulose membrane  
28 overlaid on a 3% LB agar plate and incubated face up at 37 °C for 20-24 h. Competitions  
29 were then harvested by resuspending cells in LB and counting colony forming units by  
30 plating on LB agar containing 40  $\mu$ g mL<sup>-1</sup> X-gal. The final ratio of donor:recipient colony  
31 forming units were normalized to the initial ratios of donor and recipient strains.

### 32 33 **Protein expression and purification**

34 All plasmids used for co-purification experiments (chaperone-effector pairs, tagged  
35 variants of *P. protegens* proteins and Tse6 prePAAR mutants), RhsA-RhsI-EagR1-VgrG  
36 complex for negative-stain EM, Hcp (PFL\_6089) and RhsA<sub>ANT</sub> used for antibody  
37 development or the SciW, EagT6-Tse6<sub>NT</sub> complex and the SciW-RhsI<sub>NT</sub> complex used for  
38 crystallization were expressed in *E. coli* BL21 (DE3) Gold or CodonPlus cells. Important  
39 differences in expression strategy used are indicated below.

### 40 41 *Co-purification experiments, preparation of negative stain EM samples, and preparation* 42 *of samples for antibody development*

43 Chaperone-effector pairs (e, effector; c, chaperone) from: *Pseudomonas*  
44 *aeruginosa* (e: PA0093, c: PA0094), *Salmonella* Typhimurium (e: SL1344\_0286, c:  
45 SL1344\_0285), *Shigella flexneri* (e: SF0266, c: SF3490), *Enterobacter cloacae* (e:  
46 ECL\_01567, c: ECL\_01566) and *Serratia proteamaculans* (e: Spro\_3017, c: Spro\_3016)

1 were co-expressed using pET29b containing the predicted chaperone and pETDuet-1  
2 harboring the full-length effector and its predicted immunity determinant. A similar co-  
3 expression strategy was employed for the RhsA<sub>ΔNT</sub>-RhsI complex, RhsA-RhsI-EagR1-  
4 VgrG1 complex, Tse6 and the Tse6 prePAAR variants, Tsi6 and EagT6 (see Table 6 for  
5 details). VgrG1a was expressed in isolation in pETDuet-1 and Hcp (PFL\_6089) was  
6 expressed in pET29b. For *P. protegens*, all purified proteins were expressed from their  
7 native locus.

8 For the expression of chaperone-effector pairs and the Tse6 prePAAR mutants, a 1  
9 mL overnight culture of expression strains was diluted in 50 mL of LB broth and grown at  
10 37°C (*E. coli*) until OD 0.6-0.8. 40 mL overnight cultures were grown for all other of  
11 expression strains and were diluted into 2 L of LB broth and grown to OD<sub>600</sub> 0.6-0.8 in a  
12 shaking incubator at 37°C. For most samples, protein expression was induced by the  
13 addition of 1 mM IPTG and cells were further incubated for 4.5 h at 37°C. Expression of  
14 large protein complexes (>150 kDa) in *E. coli*, such as the chaperone-effector pairs from  
15 *Salmonella* and *Enterobacter*, RhsA<sub>ΔNT</sub>-RhsI and RhsA-RhsI-EagR1-VgrG1 complexes  
16 were induced at 18 °C and incubated at this temperature overnight. One millilitre overnight  
17 cultures of *P. protegens* strains expressing the desired tagged protein was diluted in 50 mL  
18 of LB broth and grown at 30°C (*P. protegens*) until OD 0.8. Cells were harvested by  
19 centrifugation at 9,800 g for 10 min following incubation. For the RhsA-EagR1-VgrG1  
20 complex and the experiments containing Tse6 prePAAR mutants, the pellets for cells  
21 expressing the cognate VgrG were combined with the pellets containing effectors, as  
22 described above. Pellets from 50 mL culture were resuspended in 3.5 mL lysis buffer (50  
23 mM Tris-HCl pH 8.0, 300 mM NaCl, 10 mM imidazole), whereas those from 2 L of culture  
24 were resuspended in 25 mL of lysis buffer prior to rupture by sonication (6 x 30 second  
25 pulses, amplitude 30%). Cell lysates were cleared by centrifugation at 39,000 g for 60 min  
26 and the soluble fraction was loaded onto a gravity flow Ni-NTA column that had been  
27 equilibrated in lysis buffer. Ni-NTA-bound complexes were washed twice with 25 mL of  
28 lysis buffer followed by elution in 10 mL of lysis buffer containing 400 mM imidazole.  
29 The Ni-NTA purified complex was further purified by gel filtration using a HiLoad 16/600  
30 Superdex 200 column equilibrated in 20 mM Tris-HCl pH 8.0 150 mM NaCl or phosphate  
31 buffered saline (for samples used for antibody development only).

### 32 33 *Preparation of samples for crystallization*

34 *sciW* (SL1344\_0285) was synthesized with codon optimization for *E. coli* and  
35 cloned into the vector pRSETA with the restriction sites NdeI/HindIII (Life Technologies).  
36 This construct includes an N-terminal 6-his tag and an HRV 3C protease cleavage site  
37 (MGSSHHHHHSSDLEVLFGPLS). SciW-RhsI<sub>NT</sub> and EagT6-Tse6<sub>NT</sub> complexes were  
38 co-expressed using pETDUET-1. Note that the EagT6 construct has a C-terminal VSV-G  
39 tag (see Table 6). Cells were grown in LB broth to OD<sub>600</sub> 0.6 at 37°C at which point protein  
40 expression was induced by the addition of 1mM IPTG. The temperature was reduced to  
41 20°C and cultures were allowed to grow overnight. Cells were harvested by centrifugation  
42 and resuspended in lysis buffer followed by lysis with an Emulsiflex-C3 (Avestin). The  
43 lysate was cleared by centrifugation at 16,000 rpm for 30 minutes and the supernatant  
44 passed over a nickel NTA gravity column (Goldbio) followed by washing with 50 column  
45 volumes of chilled lysis including PMSF, DNase I, and MgCl<sub>2</sub>. Proteins were eluted with  
46 5 column volumes elution buffer then purified by gel-filtration using an SD75 16/60

1 Superdex gel filtration column equilibrated in gel-filtration buffer (GF) with an AKTA  
2 pure (GE Healthcare). For SciW, after affinity purification the protein was dialyzed in GF  
3 buffer O/N at 4°C and the His-tag removed during dialysis using HRV 3C protease. The  
4 digested SciW was passed over a nickel NTA gravity column and the flow through was  
5 collected. SciW was further purified using an SD75 16/60 Superdex gel filtration column  
6 equilibrated in GF buffer

7 The buffers used were as follows: SciW lysis buffer (20mM TRIS pH 7.5, 500mM  
8 NaCl, 20mM imidazole); SciW elution buffer (20mM TRIS pH 7.5, 500mM NaCl, 500mM  
9 imidazole); SciW GF buffer (20 mM TRIS pH 7.5, 250mM NaCl, 1mM 2-  
10 Mercaptoethanol); SciW-Rhs1<sub>NT</sub> and EagT6-Tse6<sub>NT</sub> complexes lysis buffer (20 mM TRIS  
11 pH 8.0, 150 mM, 25 mM imidazole); elution buffer (20 mM TRIS pH 8.0, 150 mM, 500  
12 mM imidazole); and GF buffer (20 mM TRIS pH 8.0, 150 mM NaCl, 1mM 2-  
13 Mercaptoethanol).

### 14 15 **Crystallization and structure determination**

16 SciW was concentrated to 7, 14 and 22 mg/mL for initial screening using commercially  
17 available screens (Qiagen) by sitting-drop vapor diffusion using a Crystal Gryphon robot  
18 (Art Robbins Instruments). The crystallization conditions for SciW were 22 mg/mL with a  
19 1:1 mixture of 0.1 M Tris HCL pH 8.5, 25% (v/v) PEG 550 MME at 4°C. EagT6-Tse6<sub>NT</sub>  
20 complex was concentrated to 5, 10 and 20 mg/mL and screened for crystallization  
21 conditions as per SciW. The final crystallization conditions were 20 mg/mL with a 1:1  
22 mixture of 0.2M Magnesium chloride, 0.1M Bis-TRIS pH 5.5, and 25% (w/v) PEG 3350  
23 at 4°C. SciW-Rhs1<sub>NT</sub> complex was concentrated to 15, 20 and 25mg/mL and screened for  
24 crystallization as per SciW. The crystallization conditions were 25 mg/mL protein with a  
25 1:1 mixture of 0.2M Ammonium sulfate, 0.1M Bis-TRIS pH 5.5, and 25% (w/v) PEG 3350  
26 at 4°C.

27 Diffraction data from crystals of SciW and EagT6-Tse6<sub>NT</sub> complex were collected  
28 in-house at 93K using a MicroMax-007 HF X-ray source and R-axis 4++ detector (Rigaku).  
29 Diffraction data from SciW-Rhs1<sub>NT</sub> crystals were collected at the Canadian Light Source  
30 at the Canadian Macromolecular Crystallography Facility Beam line CMCF-ID (08ID-1).  
31 SciW crystals were prepared by cryo-protection in mother liquor plus 38% PEG 550 MME  
32 and flash freezing in liquid nitrogen. Crystals of EagT6-Tse6<sub>NT</sub> and SciW-Rhs1<sub>NT</sub>  
33 complexes were prepared in the same manner with increasing the concentration of  
34 PEG3350 to 35-38%. All diffraction data were processed using XDS (Kabsch, 2010).  
35 Phases for SciW were determined by the molecular replacement-single anomalous  
36 diffraction (MR-SAD) technique. A home-source data set was collected from SciW crystals  
37 soaked in cryo-protectant containing 350 mM NaI for one-minute before flash freezing.  
38 EagT6 (PDB: 1TU1) was used as a search model and phases were improved by SAD using  
39 the Phenix package (Adams et al., 2010). Phases for both the EagT6-Tse6<sub>NT</sub> and SciW-  
40 Rhs1<sub>NT</sub> complexes were obtained by molecular replacement using EagT6 (PDB: 1TU1)  
41 and SciW as search models, respectively, with the Phenix package. Initial models were  
42 built and refined using Coot, Refmac and the CCP4 suite of programs, Phenix, and TLS  
43 refinement (Emsley et al., 2010, Murshudov et al., 1997, Winn et al., 2011, Winn et al.,  
44 2001). Data statistics and PDB codes are listed in Table 4. The coordinates and structure  
45 factors have been deposited in the Protein data Bank, Research Collaboratory for Structural  
46 Bioinformatics, Rutgers University, New Brunswick, NY ([www.rcsb.org](http://www.rcsb.org)). Molecular



1 graphics and analysis were performed using Pymol (Schrödinger, LLC) and UCSF  
2 Chimera (Pettersen et al., 2004).

### 3 **Electron microscopy and image analysis**

#### 4 *Negative stain sample preparation*

5 Four microlitres of each protein sample at a concentration of approx. 0.01 mg/mL was  
6 applied onto glow-discharged carbon-coated copper grids. After 45 s of incubation at room  
7 temperature, excess liquid was blotted away using Whatman No. 4 filter paper, followed  
8 by two washing steps with GF buffer. Samples were then stained with 1 % (w/v) uranyl  
9 formate solution and grids stored at RT until usage.

#### 10 *Data collection and image analysis*

11 Images were recorded manually with a JEOL JEM-1400 microscope, equipped with a LaB<sub>6</sub>  
12 cathode and 4k x 4k CMOS detector F416 (TVIPS), operating at 120 kV. For VgrG1,  
13 RhsA<sub>ΔNT</sub>, the EagR1-RhsA complex and EagR1-RhsA-VgrG1 complex, a total of 99, 140,  
14 100 and 120 micrographs, respectively, were collected with a pixel size of 2.26 Å. Particles  
15 for the VgrG1, RhsA<sub>ΔNT</sub>, EagR1-RhsA complex and EagR1-RhsA-VgrG1 complex  
16 datasets were selected automatically with crYOLO using individually pre-trained models,  
17 resulting in 18676, 23907, 32078 and 31409 particles, respectively (Wagner et al., 2019).  
18 Subsequent image processing was performed with the SPHIRE software package (Moriya  
19 et al., 2017). Particles were then windowed to a final box size of 240 x 240 pixel.  
20 Reference-free 2-D classification was calculated using the iterative stable alignment and  
21 clustering algorithm (ISAC) implemented in SPHIRE, resulting in 2-D class averages of  
22 the respective datasets (Yang et al., 2012). Distance measurement were performed with the  
23 e2display functionality in EMAN2 (Tang et al., 2007). The placement of the crystal  
24 structure into the electron density map (EMD-0135) was done using rigid-body fitting in  
25 Chimera (Pettersen et al., 2004). Here, Tse6-TMD and EagT6 of the EagT6-TMD crystal  
26 structure were fitted independently as rigid bodies to better describe the density. Due to the  
27 distinct shape of the PAAR domain, three different orientations were possible in the  
28 docking step, each rotated by 120°. Docking of Tse6-TMD into the density embraced by  
29 the second EagT6 described this density less well.

#### 31 **Western blot analyses**

32 Western blot analyses of protein samples were performed as described previously for rabbit  
33 anti-Tse1 (diluted 1:5,000; Genscript), rabbit anti-FLAG (diluted 1:5,000; Sigma), rabbit  
34 anti-VSV-G (diluted 1:5,000; Sigma), rabbit anti-Hcp1 (*P. aeruginosa*) (diluted 1:5,000,  
35 Genscript) and detected with anti-rabbit horseradish peroxidase-conjugated secondary  
36 antibodies (diluted 1:5,000; Sigma) (Ahmad et al., 2019). Rabbit anti-Hcp (*P. protegens*)  
37 was used at a 1:5000 dilution. Western blots were developed using chemiluminescent  
38 substrate (Clarity Max, Bio-Rad) and imaged with the ChemiDoc Imaging System (Bio-  
39 Rad).  
40

#### 41 **Data Availability**

42 All data supporting the findings of this study are available within the manuscript and its  
43 associated supplementary information. X-ray crystallographic coordinates and structure  
44

1 factor files are available from the PDB: SciW (PDB 6XRB), SciW-Rhs1<sub>NT</sub> (PDB 6XRR),  
2 EagT6-Tse6<sub>NT</sub> (PDB 6XRF). Tables containing all prePAAR effector sequences can be  
3 found in Tables 1 and 2.  
4

1 **References**

- 2
- 3 ADAMIAN, L. & LIANG, J. 2002. Interhelical hydrogen bonds and spatial motifs in  
4 membrane proteins: polar clamps and serine zippers. *Proteins*, 47, 209-18.
- 5 ADAMS, P. D., AFONINE, P. V., BUNKOCZI, G., CHEN, V. B., DAVIS, I. W.,  
6 ECHOLS, N., HEADD, J. J., HUNG, L. W., KAPRAL, G. J., GROSSE-  
7 KUNSTLEVE, R. W., MCCOY, A. J., MORIARTY, N. W., OEFFNER, R.,  
8 READ, R. J., RICHARDSON, D. C., RICHARDSON, J. S., TERWILLIGER, T.  
9 C. & ZWART, P. H. 2010. PHENIX: a comprehensive Python-based system for  
10 macromolecular structure solution. *Acta Crystallogr D Biol Crystallogr*, 66, 213-  
11 21.
- 12 AHMAD, S., WANG, B., WALKER, M. D., TRAN, H. R., STOGIOS, P. J.,  
13 SAVCHENKO, A., GRANT, R. A., MCARTHUR, A. G., LAUB, M. T. &  
14 WHITNEY, J. C. 2019. An interbacterial toxin inhibits target cell growth by  
15 synthesizing (p)ppApp. *Nature*.
- 16 ALCOFORADO DINIZ, J. & COULTHURST, S. J. 2015. Intraspecies Competition in  
17 *Serratia marcescens* Is Mediated by Type VI-Secreted Rhs Effectors and a  
18 Conserved Effector-Associated Accessory Protein. *J Bacteriol*, 197, 2350-60.
- 19 ASHKENAZY, H., ABADI, S., MARTZ, E., CHAY, O., MAYROSE, I., PUPKO, T. &  
20 BEN-TAL, N. 2016. ConSurf 2016: an improved methodology to estimate and  
21 visualize evolutionary conservation in macromolecules. *Nucleic Acids Res*, 44,  
22 W344-50.
- 23 BASLER, M., HO, B. T. & MEKALANOS, J. J. 2013. Tit-for-tat: type VI secretion  
24 system counterattack during bacterial cell-cell interactions. *Cell*, 152, 884-94.
- 25 BAYNHAM, P. J., RAMSEY, D. M., GVOZDYEV, B. V., CORDONNIER, E. M. &  
26 WOZNIAK, D. J. 2006. The *Pseudomonas aeruginosa* ribbon-helix-helix DNA-  
27 binding protein AlgZ (AmrZ) controls twitching motility and biogenesis of type  
28 IV pili. *J Bacteriol*, 188, 132-40.
- 29 BONDAGE, D. D., LIN, J. S., MA, L. S., KUO, C. H. & LAI, E. M. 2016. VgrG C  
30 terminus confers the type VI effector transport specificity and is required for  
31 binding with PAAR and adaptor-effector complex. *Proc Natl Acad Sci U S A*,  
32 113, E3931-40.
- 33 BROOKS, T. M., UNTERWEGER, D., BACHMANN, V., KOSTIUK, B. &  
34 PUKATZKI, S. 2013. Lytic activity of the *Vibrio cholerae* type VI secretion toxin  
35 VgrG-3 is inhibited by the antitoxin Tsab. *J Biol Chem*, 288, 7618-25.
- 36 BURKINSHAW, B. J., LIANG, X., WONG, M., LE, A. N. H., LAM, L. & DONG, T. G.  
37 2018. A type VI secretion system effector delivery mechanism dependent on  
38 PAAR and a chaperone-co-chaperone complex. *Nat Microbiol*, 3, 632-640.



- 1 BUSBY, J. N., PANJIKAR, S., LANDSBERG, M. J., HURST, M. R. & LOTT, J. S.  
2 2013. The BC component of ABC toxins is an RHS-repeat-containing protein  
3 encapsulation device. *Nature*, 501, 547-50.
- 4 CAPELLA-GUTIERREZ, S., SILLA-MARTINEZ, J. M. & GABALDON, T. 2009.  
5 trimAl: a tool for automated alignment trimming in large-scale phylogenetic  
6 analyses. *Bioinformatics*, 25, 1972-3.
- 7 CARDONA, S. T. & VALVANO, M. A. 2005. An expression vector containing a  
8 rhamnose-inducible promoter provides tightly regulated gene expression in  
9 *Burkholderia cenocepacia*. *Plasmid*, 54, 219-28.
- 10 CHEN, V. B., ARENDALL, W. B., 3RD, HEADD, J. J., KEEDY, D. A.,  
11 IMMORMINO, R. M., KAPRAL, G. J., MURRAY, L. W., RICHARDSON, J. S.  
12 & RICHARDSON, D. C. 2010. MolProbity: all-atom structure validation for  
13 macromolecular crystallography. *Acta Crystallogr D Biol Crystallogr*, 66, 12-21.
- 14 CIANFANELLI, F. R., ALCOFORADO DINIZ, J., GUO, M., DE CESARE, V.,  
15 TROST, M. & COULTHURST, S. J. 2016a. VgrG and PAAR Proteins Define  
16 Distinct Versions of a Functional Type VI Secretion System. *PLoS Pathog*, 12,  
17 e1005735.
- 18 CIANFANELLI, F. R., MONLEZUN, L. & COULTHURST, S. J. 2016b. Aim, Load,  
19 Fire: The Type VI Secretion System, a Bacterial Nanoweapon. *Trends Microbiol*,  
20 24, 51-62.
- 21 CURRAN, A. R. & ENGELMAN, D. M. 2003. Sequence motifs, polar interactions and  
22 conformational changes in helical membrane proteins. *Curr Opin Struct Biol*, 13,  
23 412-7.
- 24 DAWSON, J. P., MELNYK, R. A., DEBER, C. M. & ENGELMAN, D. M. 2003.  
25 Sequence context strongly modulates association of polar residues in  
26 transmembrane helices. *J Mol Biol*, 331, 255-62.
- 27 DAWSON, J. P., WEINGER, J. S. & ENGELMAN, D. M. 2002. Motifs of serine and  
28 threonine can drive association of transmembrane helices. *J Mol Biol*, 316, 799-  
29 805.
- 30 EMSLEY, P., LOHKAMP, B., SCOTT, W. G. & COWTAN, K. 2010. Features and  
31 development of Coot. *Acta Crystallogr D Biol Crystallogr*, 66, 486-501.
- 32 FLAUGNATTI, N., LE, T. T., CANAAN, S., ASCHTGEN, M. S., NGUYEN, V. S.,  
33 BLANGY, S., KELLENBERGER, C., ROUSSEL, A., CAMBILLAU, C.,  
34 CASCALES, E. & JOURNET, L. 2016. A phospholipase A1 antibacterial Type  
35 VI secretion effector interacts directly with the C-terminal domain of the VgrG  
36 spike protein for delivery. *Mol Microbiol*, 99, 1099-118.

- 1 GALAN, J. E. & WAKSMAN, G. 2018. Protein-Injection Machines in Bacteria. *Cell*,  
2 172, 1306-1318.
- 3 GOODMAN, A. L., KULASEKARA, B., RIETSCH, A., BOYD, D., SMITH, R. S. &  
4 LORY, S. 2004. A signaling network reciprocally regulates genes associated with  
5 acute infection and chronic persistence in *Pseudomonas aeruginosa*. *Dev Cell*, 7,  
6 745-54.
- 7 HMELO, L. R., BORLEE, B. R., ALMBLAD, H., LOVE, M. E., RANDALL, T. E.,  
8 TSENG, B. S., LIN, C., IRIE, Y., STOREK, K. M., YANG, J. J., SIEHNEL, R.  
9 J., HOWELL, P. L., SINGH, P. K., TOLKER-NIELSEN, T., PARSEK, M. R.,  
10 SCHWEIZER, H. P. & HARRISON, J. J. 2015. Precision-engineering the  
11 *Pseudomonas aeruginosa* genome with two-step allelic exchange. *Nat Protoc*, 10,  
12 1820-41.
- 13 HOOD, R. D., SINGH, P., HSU, F., GUVENER, T., CARL, M. A., TRINIDAD, R. R.,  
14 SILVERMAN, J. M., OHLSON, B. B., HICKS, K. G., PLEMEL, R. L., LI, M.,  
15 SCHWARZ, S., WANG, W. Y., MERZ, A. J., GOODLETT, D. R. &  
16 MOUGOUS, J. D. 2010. A type VI secretion system of *Pseudomonas aeruginosa*  
17 targets a toxin to bacteria. *Cell Host Microbe*, 7, 25-37.
- 18 HYATT, D., CHEN, G. L., LOCASCIO, P. F., LAND, M. L., LARIMER, F. W. &  
19 HAUSER, L. J. 2010. Prodigal: prokaryotic gene recognition and translation  
20 initiation site identification. *BMC Bioinformatics*, 11, 119.
- 21 JOHNSON, L. S., EDDY, S. R. & PORTUGALY, E. 2010. Hidden Markov model speed  
22 heuristic and iterative HMM search procedure. *BMC Bioinformatics*, 11, 431.
- 23 JONES, P., BINNS, D., CHANG, H. Y., FRASER, M., LI, W., MCANULLA, C.,  
24 MCWILLIAM, H., MASLEN, J., MITCHELL, A., NUKA, G., PESSEAT, S.,  
25 QUINN, A. F., SANGRADOR-VEGAS, A., SCHEREMETJEW, M., YONG, S.  
26 Y., LOPEZ, R. & HUNTER, S. 2014. InterProScan 5: genome-scale protein  
27 function classification. *Bioinformatics*, 30, 1236-40.
- 28 KABSCH, W. 2010. Xds. *Acta Crystallogr D Biol Crystallogr*, 66, 125-32.
- 29 KALL, L., KROGH, A. & SONNHAMMER, E. L. 2007. Advantages of combined  
30 transmembrane topology and signal peptide prediction--the Phobius web server.  
31 *Nucleic Acids Res*, 35, W429-32.
- 32 KATO, K. & STANDLEY, D. M. 2013. MAFFT multiple sequence alignment software  
33 version 7: improvements in performance and usability. *Mol Biol Evol*, 30, 772-80.
- 34 KELLEY, L. A., MEZULIS, S., YATES, C. M., WASS, M. N. & STERNBERG, M. J.  
35 2015. The Phyre2 web portal for protein modeling, prediction and analysis. *Nat*  
36 *Protoc*, 10, 845-58.

- 1 KRAMPEN, L., MALMSHEIMER, S., GRIN, I., TRUNK, T., LUHRMANN, A., DE  
2 GIER, J. W. & WAGNER, S. 2018. Revealing the mechanisms of membrane  
3 protein export by virulence-associated bacterial secretion systems. *Nat Commun*,  
4 9, 3467.
- 5 KROGH, A., LARSSON, B., VON HEIJNE, G. & SONNHAMMER, E. L. 2001.  
6 Predicting transmembrane protein topology with a hidden Markov model:  
7 application to complete genomes. *J Mol Biol*, 305, 567-80.
- 8 LACOURSE, K. D., PETERSON, S. B., KULASEKARA, H. D., RADEY, M. C., KIM,  
9 J. & MOUGOUS, J. D. 2018. Conditional toxicity and synergy drive diversity  
10 among antibacterial effectors. *Nat Microbiol*, 3, 440-446.
- 11 LI, W. & GODZIK, A. 2006. Cd-hit: a fast program for clustering and comparing large  
12 sets of protein or nucleotide sequences. *Bioinformatics*, 22, 1658-9.
- 13 LIANG, X., MOORE, R., WILTON, M., WONG, M. J., LAM, L. & DONG, T. G. 2015.  
14 Identification of divergent type VI secretion effectors using a conserved  
15 chaperone domain. *Proc Natl Acad Sci U S A*, 112, 9106-11.
- 16 MARIANO, G., TRUNK, K., WILLIAMS, D. J., MONLEZUN, L., STRAHL, H., PITT,  
17 S. J. & COULTHURST, S. J. 2019. A family of Type VI secretion system  
18 effector proteins that form ion-selective pores. *Nat Commun*, 10, 5484.
- 19 MOK, B. Y., DE MORAES, M. H., ZENG, J., BOSCH, D. E., KOTRYS, A. V.,  
20 RAGURAM, A., HSU, F., RADEY, M. C., PETERSON, S. B., MOOTHA, V. K.,  
21 MOUGOUS, J. D. & LIU, D. R. 2020. A bacterial cytidine deaminase toxin  
22 enables CRISPR-free mitochondrial base editing. *Nature*.
- 23 MORIYA, T., SAUR, M., STABRIN, M., MERINO, F., VOICU, H., HUANG, Z.,  
24 PENCZEK, P. A., RAUNSER, S. & GATSOGIANNIS, C. 2017. High-resolution  
25 Single Particle Analysis from Electron Cryo-microscopy Images Using SPHIRE.  
26 *J Vis Exp*.
- 27 MOUGOUS, J. D., CUFF, M. E., RAUNSER, S., SHEN, A., ZHOU, M., GIFFORD, C.  
28 A., GOODMAN, A. L., JOACHIMIAK, G., ORDONEZ, C. L., LORY, S.,  
29 WALZ, T., JOACHIMIAK, A. & MEKALANOS, J. J. 2006. A virulence locus of  
30 *Pseudomonas aeruginosa* encodes a protein secretion apparatus. *Science*, 312,  
31 1526-30.
- 32 MOUGOUS, J. D., GIFFORD, C. A., RAMSDELL, T. L. & MEKALANOS, J. J. 2007.  
33 Threonine phosphorylation post-translationally regulates protein secretion in  
34 *Pseudomonas aeruginosa*. *Nat Cell Biol*, 9, 797-803.
- 35 MURSHUDOV, G. N., VAGIN, A. A. & DODSON, E. J. 1997. Refinement of  
36 macromolecular structures by the maximum-likelihood method. *Acta Crystallogr*  
37 *D Biol Crystallogr*, 53, 240-55.

- 1 NGUYEN, V. S., JOBICHEN, C., TAN, K. W., TAN, Y. W., CHAN, S. L., RAMESH,  
2 K., YUAN, Y., HONG, Y., SEETHARAMAN, J., LEUNG, K. Y.,  
3 SIVARAMAN, J. & MOK, Y. K. 2015. Structure of AcrH-AopB Chaperone-  
4 Translocator Complex Reveals a Role for Membrane Hairpins in Type III  
5 Secretion System Translocon Assembly. *Structure*, 23, 2022-31.
- 6 PAULSEN, I. T., PRESS, C. M., RAVEL, J., KOBAYASHI, D. Y., MYERS, G. S. A.,  
7 MAVRODI, D. V., DEBOY, R. T., SESHADRI, R., REN, Q., MADUPU, R.,  
8 DODSON, R. J., DURKIN, A. S., BRINKAC, L. M., DAUGHERTY, S. C.,  
9 SULLIVAN, S. A., ROSOVITZ, M. J., GWINN, M. L., ZHOU, L.,  
10 SCHNEIDER, D. J., CARTINHO, S. W., NELSON, W. C., WEIDMAN, J.,  
11 WATKINS, K., TRAN, K., KHOURI, H., PIERSON, E. A., PIERSON, L. S.,  
12 THOMASHOW, L. S. & LOPER, J. E. 2005. Complete genome sequence of the  
13 plant commensal *Pseudomonas fluorescens* Pf-5. *Nature Biotechnology*, 23, 873-  
14 878.
- 15 PEI, T. T., LI, H., LIANG, X., WANG, Z. H., LIU, G., WU, L. L., KIM, H., XIE, Z.,  
16 YU, M., LIN, S., XU, P. & DONG, T. G. 2020. Intramolecular chaperone-  
17 mediated secretion of an Rhs effector toxin by a type VI secretion system. *Nat*  
18 *Commun*, 11, 1865.
- 19 PETERSEN, E. F., GODDARD, T. D., HUANG, C. C., COUCH, G. S.,  
20 GREENBLATT, D. M., MENG, E. C. & FERRIN, T. E. 2004. UCSF Chimera--a  
21 visualization system for exploratory research and analysis. *J Comput Chem*, 25,  
22 1605-12.
- 23 PISSARIDOU, P., ALLSOPP, L. P., WETTSTADT, S., HOWARD, S. A.,  
24 MAVRIDOU, D. A. I. & FILLOUX, A. 2018. The *Pseudomonas aeruginosa*  
25 T6SS-VgrG1b spike is topped by a PAAR protein eliciting DNA damage to  
26 bacterial competitors. *Proc Natl Acad Sci U S A*, 115, 12519-12524.
- 27 PRICE, M. N., DEHAL, P. S. & ARKIN, A. P. 2010. FastTree 2--approximately  
28 maximum-likelihood trees for large alignments. *PLoS One*, 5, e9490.
- 29 QUENTIN, D., AHMAD, S., SHANTHAMOORTHY, P., MOUGOUS, J. D.,  
30 WHITNEY, J. C. & RAUNSER, S. 2018. Mechanism of loading and  
31 translocation of type VI secretion system effector Tse6. *Nat Microbiol*, 3, 1142-  
32 1152.
- 33 RENAULT, M. G., ZAMARRENO BEAS, J., DOUZI, B., CHABALIER, M., ZOUED,  
34 A., BRUNET, Y. R., CABBILLAU, C., JOURNET, L. & CASCALES, E. 2018.  
35 The gp27-like Hub of VgrG Serves as Adaptor to Promote Hcp Tube Assembly. *J*  
36 *Mol Biol*, 430, 3143-3156.
- 37 RIETSCH, A., VALLET-GELY, I., DOVE, S. L. & MEKALANOS, J. J. 2005. ExsE, a  
38 secreted regulator of type III secretion genes in *Pseudomonas aeruginosa*. *Proc*  
39 *Natl Acad Sci U S A*, 102, 8006-11.

- 1 RUSSELL, A. B., HOOD, R. D., BUI, N. K., LEROUX, M., VOLLMER, W. &  
2 MOUGOUS, J. D. 2011. Type VI secretion delivers bacteriolytic effectors to  
3 target cells. *Nature*, 475, 343-7.
- 4 SAMSONOV, V. V., SAMSONOV, V. V. & SINEOKY, S. P. 2002. DcrA and dcrB  
5 *Escherichia coli* genes can control DNA injection by phages specific for BtuB and  
6 FhuA receptors. *Res Microbiol*, 153, 639-46.
- 7 SHNEIDER, M. M., BUTH, S. A., HO, B. T., BASLER, M., MEKALANOS, J. J. &  
8 LEIMAN, P. G. 2013. PAAR-repeat proteins sharpen and diversify the type VI  
9 secretion system spike. *Nature*, 500, 350-353.
- 10 SILVERMAN, J. M., AGNELLO, D. M., ZHENG, H., ANDREWS, B. T., LI, M.,  
11 CATALANO, C. E., GONEN, T. & MOUGOUS, J. D. 2013. Haemolysin  
12 coregulated protein is an exported receptor and chaperone of type VI secretion  
13 substrates. *Mol Cell*, 51, 584-93.
- 14 SPINOLA-AMILIBIA, M., DAVO-SIGUERO, I., RUIZ, F. M., SANTILLANA, E.,  
15 MEDRANO, F. J. & ROMERO, A. 2016. The structure of VgrG1 from  
16 *Pseudomonas aeruginosa*, the needle tip of the bacterial type VI secretion system.  
17 *Acta Crystallogr D Struct Biol*, 72, 22-33.
- 18 TANG, G., PENG, L., BALDWIN, P. R., MANN, D. S., JIANG, W., REES, I. &  
19 LUDTKE, S. J. 2007. EMAN2: an extensible image processing suite for electron  
20 microscopy. *J Struct Biol*, 157, 38-46.
- 21 TANG, J. Y., BULLEN, N. P., AHMAD, S. & WHITNEY, J. C. 2018. Diverse NADase  
22 effector families mediate interbacterial antagonism via the type VI secretion  
23 system. *J Biol Chem*, 293, 1504-1514.
- 24 TAREEN, A. & KINNEY, J. B. 2020. Logomaker: beautiful sequence logos in Python.  
25 *Bioinformatics*, 36, 2272-2274.
- 26 TING, S. Y., BOSCH, D. E., MANGIAMELI, S. M., RADEY, M. C., HUANG, S.,  
27 PARK, Y. J., KELLY, K. A., FILIP, S. K., GOO, Y. A., ENG, J. K., ALLAIRE,  
28 M., VEESLER, D., WIGGINS, P. A., PETERSON, S. B. & MOUGOUS, J. D.  
29 2018. Bifunctional Immunity Proteins Protect Bacteria against FtsZ-Targeting  
30 ADP-Ribosylating Toxins. *Cell*, 175, 1380-1392 e14.
- 31 TING, S. Y., MARTINEZ-GARCIA, E., HUANG, S., BERTOLLI, S. K., KELLY, K.  
32 A., CUTLER, K. J., SU, E. D., ZHI, H., TANG, Q., RADEY, M. C.,  
33 RAFFATELLU, M., PETERSON, S. B., DE LORENZO, V. & MOUGOUS, J. D.  
34 2020. Targeted Depletion of Bacteria from Mixed Populations by Programmable  
35 Adhesion with Antagonistic Competitor Cells. *Cell Host Microbe*.
- 36 UNTERWEGER, D., KOSTIUK, B. & PUKATZKI, S. 2017. Adaptor Proteins of Type  
37 VI Secretion System Effectors. *Trends Microbiol*, 25, 8-10.

- 1 VANCE, R. E., RIETSCH, A. & MEKALANOS, J. J. 2005. Role of the type III secreted  
2 exoenzymes S, T, and Y in systemic spread of *Pseudomonas aeruginosa* PAO1 in  
3 vivo. *Infect Immun*, 73, 1706-13.
- 4 WAGNER, T., MERINO, F., STABRIN, M., MORIYA, T., ANTONI, C., APELBAUM,  
5 A., HAGEL, P., SITSEL, O., RAISCH, T., PRUMBAUM, D., QUENTIN, D.,  
6 RODERER, D., TACKE, S., SIEBOLDS, B., SCHUBERT, E., SHAIKH, T. R.,  
7 LILL, P., GATSOGIANNIS, C. & RAUNSER, S. 2019. SPHIRE-crYOLO is a  
8 fast and accurate fully automated particle picker for cryo-EM. *Commun Biol*, 2,  
9 218.
- 10 WHITNEY, J. C., BECK, C. M., GOO, Y. A., RUSSELL, A. B., HARDING, B. N., DE  
11 LEON, J. A., CUNNINGHAM, D. A., TRAN, B. Q., LOW, D. A., GOODLETT,  
12 D. R., HAYES, C. S. & MOUGOUS, J. D. 2014. Genetically distinct pathways  
13 guide effector export through the type VI secretion system. *Mol Microbiol*, 92,  
14 529-42.
- 15 WHITNEY, J. C., QUENTIN, D., SAWAI, S., LEROUX, M., HARDING, B. N.,  
16 LEDVINA, H. E., TRAN, B. Q., ROBINSON, H., GOO, Y. A., GOODLETT, D.  
17 R., RAUNSER, S. & MOUGOUS, J. D. 2015. An interbacterial NAD(P)(+)  
18 glycohydrolase toxin requires elongation factor Tu for delivery to target cells.  
19 *Cell*, 163, 607-19.
- 20 WINN, M. D., BALLARD, C. C., COWTAN, K. D., DODSON, E. J., EMSLEY, P.,  
21 EVANS, P. R., KEEGAN, R. M., KRISINEL, E. B., LESLIE, A. G., MCCOY,  
22 A., MCNICHOLAS, S. J., MURSHUDOV, G. N., PANNU, N. S., POTTERTON,  
23 E. A., POWELL, H. R., READ, R. J., VAGIN, A. & WILSON, K. S. 2011.  
24 Overview of the CCP4 suite and current developments. *Acta Crystallogr D Biol*  
25 *Crystallogr*, 67, 235-42.
- 26 WINN, M. D., ISUPOV, M. N. & MURSHUDOV, G. N. 2001. Use of TLS parameters  
27 to model anisotropic displacements in macromolecular refinement. *Acta*  
28 *Crystallogr D Biol Crystallogr*, 57, 122-33.
- 29 WOOD, T. E., HOWARD, S. A., WETTSTADT, S. & FILLOUX, A. 2019. PAAR  
30 proteins act as the 'sorting hat' of the type VI secretion system. *Microbiology*, 165,  
31 1203-1218.
- 32 YANG, Z., FANG, J., CHITTULURU, J., ASTURIAS, F. J. & PENCZEK, P. A. 2012.  
33 Iterative stable alignment and clustering of 2D transmission electron microscope  
34 images. *Structure*, 20, 237-47.
- 35 YU, G. 2020. Using ggtree to Visualize Data on Tree-Like Structures. *Curr Protoc*  
36 *Bioinformatics*, 69, e96.

1 ZHANG, D., IYER, L. M. & ARAVIND, L. 2011. A novel immunity system for bacterial  
2 nucleic acid degrading toxins and its recruitment in various eukaryotic and DNA  
3 viral systems. *Nucleic Acids Res*, 39, 4532-52.  
4  
5



1 **Figure 1 | The prePAAR motif is conserved across multiple bacterial genera and is**  
2 **found in T6SS effectors that interact with Eag chaperones.** A) Genomic arrangement  
3 of T6SS chaperone-effector-immunity genes for characterized *effector associated gene*  
4 family members (*eag*; shown in blue), which encode DUF1795 domain-containing  
5 chaperones. B) Schematic depicting Eag chaperone interactions with the transmembrane  
6 domain (TMD) regions of the model chaperone-effector pair EagT6-Tse6. C) Protein  
7 architecture and sequence logo for the prePAAR motif found in the N-terminus of Tse6.  
8 An alignment of 2,054 sequences was generated using the 61 N-terminal residues of Tse6  
9 as the search query. The relative frequency of each residue and information content in bits  
10 was calculated at every position of the sequence and then normalized by the sum of each  
11 position's information bits. Transparency is used to indicate probability of a residue  
12 appearing at a specific position. Residues coloured in pink correspond to the prePAAR  
13 motif: AARxxDxxxH. D) Genomes from genera of Proteobacteria known to contain  
14 functional T6SSs (*Burkholderia*, *Escherichia*, *Enterobacter*, *Pseudomonas*, *Salmonella*,  
15 *Serratia*, *Shigella*, *Yersinia*) were screened for unique prePAAR effectors. Percentage of  
16 total genomes that contained 1 to 6 prePAAR motifs is indicated. E) Phylogenetic  
17 distribution of 1,166 non-redundant prePAAR-containing effectors identified in **B**. TM  
18 prediction algorithms were used to quantify the number of TM regions in each effector.  
19 The two classes that emerged are labeled in green (class I; 1 TM region-containing  
20 effectors) and blue (class II; 2 TM region-containing effectors). Branch lengths indicates  
21 evolutionary distances. F) Effector sequences within class I or class II were aligned, and a  
22 sequence logo was generated based on the relative frequency of each residue at each  
23 position to identify characteristic motifs of both classes. Four different regions (r1-r4) after  
24 the PAAR and TM regions were found to harbour conserved residues. Class I effectors  
25 contain YD repeat regions (r1-3) characteristic of Rhs proteins whereas a  
26 GxxxxGxxLxGxxxD motif (r4) was identified in class II effectors. G) Western blot  
27 analysis of five effector-chaperone pairs that were selected from the indicated genera,  
28 based on the analysis in **B**. Each pair was co-expressed in *E. coli* and co-purified using  
29 nickel affinity chromatography. The class and number of TM regions from each pair are  
30 indicated. Locus tags for each pair (e, effector; c, chaperone) are as follows: *Enterobacter*  
31 (e: ECL\_01567, c: ECL\_01566), *Shigella* (e: SF0266, c: SF3490), *Salmonella* (e:  
32 SL1344\_0286, c: SL1344\_0285), *Serratia* (e: Spro\_3017, c: Spro\_3016), *Pseudomonas* (e:  
33 PA0093, c: PA0094). Note that the Rhs component of the class I prePAAR effector  
34 SF0266 is encoded by the downstream open reading frame SF0267 (see Extended Data  
35 Figure 1C for details).

36  
37 **Figure 2 | Eag chaperones are specific for their cognate prePAAR effector and are**  
38 **necessary for effector stability *in vivo*.** A) Genomic context of two prePAAR-containing  
39 effector-immunity pairs from *P. protegens* Pf-5. RhsA is a class I effector (shown in green)  
40 and Tne2 is a class II effector (shown in blue). Shading is used to differentiate effector  
41 (dark) and immunity genes (light). Predicted *eag* genes are shown in purple. B) Outcome  
42 of intraspecific growth competition assays between the indicated *P. protegens* donor and  
43 recipient strains. Donor strains were competed with recipient strains lacking *rhsA-rhsI*  
44 (green) or *tne2-tni2* (blue). Both recipients are lacking *pppA* to stimulate type VI secretion.  
45 Data are mean  $\pm$ s.d. for  $n = 3$  biological replicates and are representative of two  
46 independent experiments;  $P$  values shown are from two-tailed, unpaired  $t$ -tests. C) Western

1 blot analysis of *E. coli* cell lysates from cells expressing the indicated effectors (RhsA or  
2 Tne2) and either empty vector, PFL\_6095-V or PFL\_6099-V. D) Affinity-tagged RhsA or  
3 Tne2 were purified from cell fractions of the indicated *P. protegens* strains and visualized  
4 using western blot analysis. Deletion constructs for each *eag* gene were introduced into  
5 each of the indicated parent backgrounds. A non-specific band present in the SDS-PAGE  
6 gel was used as a loading control. C-D) Data are representative of two independent  
7 experiments.

8  
9 **Figure 3 | An Eag chaperone promotes the stability of its cognate class I prePAAR**  
10 **effector by interacting with its prePAAR and TMD-containing N-terminus. A)**

11 Domain architecture of *P. protegens* RhsA and a truncated variant lacking its prePAAR  
12 and TMD-containing N-terminus (RhsA<sub>ΔNT</sub>). B) EagR1 interacts with the N-terminus of  
13 RhsA. His<sub>6</sub>-tagged RhsA or RhsA<sub>ΔNT</sub> and co-expressed with EagR1 in *E. coli*, purified  
14 using affinity chromatography and detected by western blot. C) Affinity purification of  
15 chromosomally His<sub>10</sub>-tagged RhsA or RhsA<sub>ΔNT</sub> from cell fractions of the indicated *P.*  
16 *protegens* strains. The parent strain expresses chromosomally encoded His<sub>10</sub>-tagged  
17 RhsA. The loading control is a non-specific band on the blot. D) Outcome of growth  
18 competition assays between the indicated donor and recipient strains of *P. protegens*.  
19 Data are mean ±s.d. for *n* = 3 biological replicates; *P* value shown is from a two-tailed,  
20 unpaired *t*-test. E) Affinity purification of His<sub>10</sub>-RhsA or His<sub>10</sub>-RhsA<sub>ΔNT</sub> from a *P.*  
21 *protegens* Pf-5 strain containing a chromosomally encoded FLAG epitope tag fused to  
22 *vgrG1*. FLAG-tagged VgrG1 was detected by western blot. F-I) Representative negative-  
23 stain EM class averages for purified VgrG1 (F), RhsA<sub>ΔNT</sub> (G), EagR1-RhsA complex (H)  
24 and EagR1-RhsA-VgrG complex (I). Scale bar represents 10 nm for all images. All  
25 proteins were expressed and purified from *E. coli*. B-C, E) Data are representative of two  
26 independent experiments.

27  
28 **Figure 4 | Co-crystal structures of the N-terminus of class I and class II prePAAR**  
29 **effectors in complex with their cognate Eag chaperones. A)**

30 An X-ray crystal structure of the Eag chaperone SciW bound to the N-terminus of *Salmonella* Typhimurium class I  
31 prePAAR effector Rhs1 (Rhs1<sub>NT</sub>, residues 8-57 are modeled) shown in two views related  
32 by a ~90° rotation. B) Structural overlay of the apo-SciW structure with SciW-Rhs1<sub>NT</sub>  
33 complex demonstrates that a considerable conformational change in SciW occurs upon  
34 effector binding. C) An X-ray crystal structure of the Eag chaperone EagT6 bound to the  
35 N-terminus of Tse6 (Tse6<sub>NT</sub>, residues 1-38 and 41-58 are modeled) shown in two views  
36 related by a ~90° rotation. D) Structural overlay of the apo-EagT6 structure (PDB 1TU1)  
37 with the EagT6-Tse6<sub>NT</sub> complex shows a minor conformational change in EagT6  
38 occurring upon effector binding. Eag chaperones are colored by chain, N-terminal  
39 transmembrane domains (TMDs) are colored in orange, the pre-PAAR motif in red, and  
40 apo chaperone structure in dark blue. Positions of residues of interest in the effector N-  
41 terminal regions are labeled.

42  
43 **Figure 5 | Eag chaperones interact with effector TMDs by mimicking interhelical**  
44 **interactions of alpha helical membrane proteins. A)** Alignment of Eag chaperones that  
45 interact with class I (SciW, EagR1) or class II (EagT6 and EagT2) prePAAR effectors  
46 plotted with secondary structure elements. B) Residues making intimate molecular

1 contacts with their respective TMDs that are conserved among SciW, EagR1, EagT6 and  
2 EagT2 are shown. Hydrophobic contacts are colored in light orange and polar contacts in  
3 deep red. Residue numbers are based on EagT6. C and D) The conserved hydrophobic  
4 molecular surface of the chaperones is shown in light orange (C) and their molecular  
5 surface residue conservation is shown as determined by the ConSurf server  
6 (D)(Ashkenazy et al., 2016). Conserved residues making contacts with the TMDs in both  
7 co-crystal structures are shown. E) Molecular contact map of Rhs1<sub>NT</sub> (residues 1-59) and  
8 SciW. prePAAR is shown in pink and the TMD regions in gold. Amino acids making  
9 contacts with the conserved residues of the Eag chaperones are shown by side chain/and  
10 or by main chain atoms (red for carbonyl and blue for amide). Residues in the Eag  
11 chaperone are highlighted by color of chain A or B. Polar (H-bond) contacts are drawn  
12 with a purple dashed line and are made with the side chain of the listed Eag residue.  
13 Outlined red circles indicate a water molecule. Light green circles indicate van der Waals  
14 interactions and hydrophobic interactions. The central group of hydrophobic residues  
15 without a listed chaperone residue all pack into the Eag hydrophobic face in Figure 4G  
16 (EagT6 I22/24 and V39). F) Molecular contact map of Tse6<sub>NT</sub> (residues 1-61) and EagT6.  
17 Schematic is the same as panel B. Q102 in EagT6 corresponds to Q106 in SciW. G)  
18 Structural alignment of SciW-Rhs1<sub>NT</sub> and EagT6-Tse6<sub>NT</sub> co-crystal structures using the  
19 structurally conserved TM helix as a reference. Eag chain coloring is the same as Figure  
20 4. Rhs1<sub>NT</sub> is colored in dark blue with a brown prePAAR and Tse6<sub>NT</sub> in gold with a pink  
21 prePAAR. The conserved solvent accessible prePAAR residues D9/11 and H13/15 are  
22 shown in ball and stick model. Inset sequence alignment reflects the structurally aligned  
23 residues of Rhs1<sub>NT</sub> (top) and Tse6<sub>NT</sub> (bottom) as calculated by UCSF Chimera (Pettersen  
24 et al., 2004). Secondary structural elements are labeled. H) Docking of the EagT6-TMD  
25 crystal structure from Figure 4C into the previously obtained cryo-EM density map of the  
26 EagT6-Tse6-EF-Tu-Tsi6-VgrG1a complex (EMD-0135). Cryo-EM density  
27 corresponding to EagT6 is depicted in transparent grey and Tse6-TMD and Tse6-PAAR  
28 in green; prePAAR residues are shown in pink. Note that Tse6-TMD was docked  
29 independent of EagT6 into the Tse6 density. One of three possible orientations for the  
30 PAAR domain is shown.

31

32 **Figure 6 | prePAAR is required for PAAR domain interaction with the VgrG spike.**  
33 **A)** Western blot analysis of Tse6 from cell fractions of the indicated *P. aeruginosa*  
34 strains. Low-molecular weight band indicates Tse6 alone whereas high-molecular weight  
35 band indicates Tse6-VgrG1a complex. The parental strain contains a  $\Delta retS$  deletion to  
36 transcriptionally activate the T6SS (Goodman et al., 2004). **B)** Outcome of growth  
37 competition assay between the indicated *P. aeruginosa* donor and recipient strains. The  
38 parent strain is *P. aeruginosa*  $\Delta retS$ . Data are mean  $\pm$ s.d. for  $n = 3$  biological replicates;  $P$   
39 value shown is from a two-tailed, unpaired  $t$ -test; ns indicates data that are not  
40 significantly different. **C)** Structural comparison of the c1882 PAAR protein from *E. coli*  
41 (PDB: 4JIW) with a model of the PAAR domain of Tse6 generated using Phyre<sup>2</sup> (Kelley  
42 et al., 2015). The overlay shows the additional N-terminal segment present in c1882 that  
43 is absent in Tse6. **C and D)** Schematic showing the residue boundaries of the different  
44 regions of Tse6. The prePAAR (pink) and PAAR (blue) sequences were artificially fused  
45 to generate Tse6<sub>prePAAR+PAAR</sub> and used to generate an alignment with c1882 (**C**) and a  
46 structural model (**D**). Pink space-filling representation indicates the region of the model

1 comprised of prePAAR. F and G) Western blot of elution samples from affinity pull-  
2 down of His<sub>6</sub>-tagged Tse6<sub>NT</sub>, containing only prePAAR and the first TMD (residues 1-  
3 61), co-expressed in *E. coli* with EagT6 and the PAAR domain of Tse6 with the indicated  
4 epitope tags (F) or with the indicated His<sub>6</sub>-tagged Tse6 variants co-purified with VgrG1a-  
5 FLAG and EagT6-VSV-G in *E. coli* (G). A, F, G) Data are representative of two  
6 independent experiments.

7  
8 **Figure 7 | Model depicting the role of Eag chaperones and prePAAR in type VI**  
9 **secretion.** A) PAAR proteins exist with or without prePAAR domains. Those that lack  
10 prePAAR (orphan), can interact with VgrG and form a functional T6SS spike complex  
11 without any additional factors. By contrast, prePAAR-containing effectors contain  
12 multiple domains (evolved) and require the prePAAR motif for proper folding of the  
13 PAAR domain and thus, loading onto the T6SS apparatus. B) prePAAR-containing  
14 effectors can be divided into two classes: class I effectors have a single TMD and contain  
15 a C-terminal toxin domain that is likely housed within a Rhs cage whereas class II  
16 effectors contain two TMDs and do not possess a Rhs cage. TMD-chaperone and  
17 prePAAR-PAAR interactions are required for effector stability and VgrG interaction,  
18 respectively, for both classes of prePAAR effectors. C) Depiction of a prePAAR-  
19 containing effector being exported by the T6SS into recipient cells. Inset shows the  
20 hydrophobic TMDs of a class II prePAAR effector disrupting the inner membrane of the  
21 target bacterium to allow entry of the effector toxin domain into the cytoplasm.

22  
23

1 **Table 1. List of prePAAR motif-containing proteins identified in the UniProtKB**  
2 **Database (provided as Table\_S1\_UniprotKB\_prePAAR\_D01.xlsx file).** The  
3 document contains two separate sheets. Dataset A corresponds to 2,054 prePAAR-  
4 containing sequences that were identified through an iterative search of the UniprotKB  
5 using Tse6<sub>NT</sub>. Dataset B corresponds to 975 sequences collected following filtering of  
6 dataset A (see methods for details).  
7  
8



1 **Table 2. List of prePAAR motif-containing proteins from assembled genomes of all**  
2 **species belonging to the genera *Burkholderia*, *Escherichia*, *Enterobacter*,**  
3 ***Pseudomonas*, *Salmonella*, *Serratia*, *Shigella* and *Yersinia* (provided as**  
4 **Table\_S2\_8\_genera\_prePAAR\_D01.xlsx file).** The document contains two separate  
5 sheets. Dataset C corresponds to 6,101 prePAAR-containing sequences that were  
6 identified through an iterative search of the UniprotKB using Tse6<sub>NT</sub>. Dataset D  
7 corresponds to 1,166 sequences collected following filtering of dataset C (see methods  
8 for details).  
9

1 **Table 3. Summary of the number of genomes and effector sequences used in our**  
2 **informatics analyses (provided as Table\_S3\_methods\_D01.xlsx file).** This document  
3 contains three separate sheets. The “UniprotKB-effectors” sheet shows the quantity of  
4 initial prePAAR-containing sequences that were identified in our search and the number  
5 of sequences that were used following filtering and removal of redundancy (plotted in the  
6 cladogram in Figure S1A). The numbers in bold indicate the number of sequences in  
7 Table 1. The “8 genera - genomes” sheet corresponds to the number of genomes from the  
8 8 genera (*Burkholderia*, *Escherichia*, *Enterobacter*, *Pseudomonas*, *Salmonella*, *Serratia*,  
9 *Shigella* and *Yersinia*) that contained one prePAAR-containing sequence and the number  
10 that remained following filtering and removal of redundancy. The “8-genera – effectors”  
11 sheet corresponds to initial and final numbers of prePAAR-containing sequences that  
12 were identified in the 8 genera listed above. The final number of sequences in this sheet  
13 were used to construct the cladogram in Figure 1E. The numbers in bold indicate the  
14 numbers of sequences in the datasets in Table 2.  
15

1 **Table 4. X-ray data collection and refinement statistics.**

2

|                                                                      | SciW (native)                                 | SciW (Iodide)                                 | SciW-Rhs1 <sub>1-59</sub>      | EagT6-Tse6 <sub>1-61</sub> |
|----------------------------------------------------------------------|-----------------------------------------------|-----------------------------------------------|--------------------------------|----------------------------|
| <b>Data Collection</b>                                               |                                               |                                               |                                |                            |
| Wavelength (Å)                                                       | 1.5418                                        | 1.5418                                        | 0.97895                        | 1.5418                     |
| Space group                                                          | P2 <sub>1</sub> 2 <sub>1</sub> 2 <sub>1</sub> | P2 <sub>1</sub> 2 <sub>1</sub> 2 <sub>1</sub> | P3 <sub>1</sub> 2 <sub>1</sub> | P3 <sub>2</sub>            |
| Cell dimensions                                                      |                                               |                                               |                                |                            |
| <i>a</i> , <i>b</i> , <i>c</i> (Å)                                   | 55.27 75.1<br>76.6                            | 55.6 75.3 76.4                                | 105.3 105.3 248.4              | 68.9 68.9 173.1            |
| $\alpha$ , $\beta$ , $\gamma$ (°)                                    | 90 90 90                                      | 90 90 90                                      | 90 90 120                      | 90 90 120                  |
| Resolution (Å)                                                       | 29.03-1.75                                    | 19.63-2.21                                    | 91.20-1.90                     | 28.22-2.55                 |
| Unique reflections                                                   | 32309 (3162) <sup>a</sup>                     | 29933 (4888)                                  | 126298 (12473)                 | 29267 (2832)               |
| CC(1/2)                                                              | 99.8 (89.1)                                   | 99.6 (81.4)                                   | 99.9 (53.9)                    | 99.6 (52.8)                |
| <i>R</i> <sub>merge</sub> (%) <sup>b</sup>                           | 6.2 (91.3)                                    | 6.1 (44.7)                                    | 5.7 (34.6)                     | 15.5 (179.8)               |
| <i>I</i> / $\sigma$ <i>I</i>                                         | 14.2 (1.9)                                    | 8.0 (1.8)                                     | 11.6 (1.26)                    | 7.27 (0.92)                |
| Completeness (%)                                                     | 99.5 (98.8)                                   | 96.0 (97.9)                                   | 99.9 (99.9)                    | 99.3 (96.9)                |
| Redundancy                                                           | 7.0 (6.8)                                     | 2.0 (1.9)                                     | 9.9 (9.7)                      | 4.9 (4.8)                  |
| <b>Refinement</b>                                                    |                                               |                                               |                                |                            |
| <i>R</i> <sub>work</sub> / <i>R</i> <sub>free</sub> (%) <sup>c</sup> | 19.8/22.6                                     |                                               | 18.7/21.4                      | 22.9/26.6                  |
| Average B-factors (Å <sup>2</sup> )                                  | 46.1                                          |                                               | 42.9                           | 71.7                       |
| Protein                                                              | 45.1                                          |                                               | 42.5                           | 72.1                       |
| Ligands                                                              | 60.8                                          |                                               | 123.4                          |                            |
| Water                                                                | 53.9                                          |                                               | 42.2                           | 59.3                       |
| No. atoms                                                            |                                               |                                               |                                |                            |
| Protein                                                              | 2331                                          |                                               | 10492                          | 7827                       |
| Ligands                                                              | 10                                            |                                               | 60                             |                            |
| Water                                                                | 256                                           |                                               | 1119                           | 248                        |
| Rms deviations                                                       |                                               |                                               |                                |                            |
| Bond lengths (Å)                                                     | 0.003                                         |                                               | 0.005                          | 0.004                      |
| Bond angles (°)                                                      | 0.67                                          |                                               | 0.68                           | 0.73                       |
| Ramachandran plot (%) <sup>d</sup>                                   |                                               |                                               |                                |                            |
| Total favored                                                        | 99.65                                         |                                               | 99.24                          | 98.26                      |
| Total allowed                                                        | 0.35                                          |                                               | 0.68                           | 1.74                       |
| PDB code                                                             | 6XRB                                          |                                               | 6XRR                           | 6XRF                       |

3

<sup>a</sup>Values in parentheses correspond to the highest resolution shell.

4

<sup>b</sup> $R_{\text{merge}} = \frac{\sum \sum |I(k) - \langle I \rangle|}{\sum I(k)}$  where  $I(k)$  and  $\langle I \rangle$  represent the diffraction intensity values of the individual measurements and the corresponding mean values. The summation is over all unique measurements.

7

<sup>c</sup> $R_{\text{work}} = \frac{\sum ||F_{\text{obs}}| - k|F_{\text{calc}}||}{\sum |F_{\text{obs}}|}$  where  $F_{\text{obs}}$  and  $F_{\text{calc}}$  are the observed and calculated structure factors, respectively.  $R_{\text{free}}$  is the sum extended over a subset of reflections excluded from all stages of the refinement.

9

<sup>d</sup>As calculated using MOLPROBITY (Chen et al., 2010).

10

11

12

1 **Table 5: Strains used in this study.**

| Organism                     | Genotype                                                                                       | Description                                                                                               | Reference                         |
|------------------------------|------------------------------------------------------------------------------------------------|-----------------------------------------------------------------------------------------------------------|-----------------------------------|
| <i>P. protegens</i> Pf-5     | wild-type                                                                                      |                                                                                                           | (Paulsen et al., 2005)            |
|                              | $\Delta$ PFL_6095                                                                              | <i>eagR1</i> deletion strain                                                                              | This study                        |
|                              | $\Delta$ PFL_6099                                                                              | <i>eagT2</i> deletion strain                                                                              | This study                        |
|                              | $\Delta$ PFL_6209                                                                              | <i>tne2</i> deletion strain                                                                               | (Tang et al., 2018)               |
|                              | $\Delta$ PFL_6096                                                                              | <i>rhsA</i> deletion strain                                                                               | (Tang et al., 2018)               |
|                              | $\Delta$ PFL_6079                                                                              | <i>pppA</i> deletion strain                                                                               | This study                        |
|                              | $\Delta$ PFL_6094                                                                              | <i>vgrG1</i> deletion strain                                                                              | This study                        |
|                              | $\Delta$ PFL_6096 $\Delta$ PFL_6097<br>attB:: <i>lacZ</i> , Tet <sup>R</sup>                   | <i>rhsA rhsI</i> deletion strain,<br>constitutive <i>lacZ</i><br>expression, Tet <sup>R</sup>             | This study                        |
|                              | $\Delta$ PFL_6079 $\Delta$ PFL_6096<br>$\Delta$ PFL_6097 attB:: <i>lacZ</i> , Tet <sup>R</sup> | <i>pppA rhsA rhsI</i> deletion<br>strain, constitutive <i>lacZ</i><br>expression, Tet <sup>R</sup>        | This study                        |
|                              | $\Delta$ PFL_6079 $\Delta$ PFL_6209<br>$\Delta$ PFL_6210 attB:: <i>lacZ</i> , Tet <sup>R</sup> | <i>pppA tne2 tni2</i> deletion<br>strain, constitutive <i>lacZ</i><br>expression, Tet <sup>R</sup>        | This study                        |
|                              | His <sub>10</sub> -PFL_6096                                                                    | Expresses RhsA with a<br>N-terminal His <sub>10</sub> tag                                                 | This study                        |
|                              | $\Delta$ PFL_6095 His <sub>10</sub> -PFL_6096                                                  | <i>eagR1</i> deletion strain<br>expressing His <sub>10</sub> -RhsA                                        | This study                        |
|                              | $\Delta$ PFL_6099 His <sub>10</sub> -PFL_6096                                                  | <i>eagT2</i> deletion strain<br>expressing His <sub>10</sub> -RhsA                                        | This study                        |
|                              | His <sub>10</sub> -PFL_6209-VSV-G                                                              | Expresses Tne2 with a<br>N-terminal His <sub>10</sub> tag and<br>a C-terminal VSV-G tag                   | This study                        |
|                              | $\Delta$ PFL_6095 His <sub>10</sub> -PFL_6209-<br>VSV-G                                        | <i>eagR1</i> deletion strain<br>expressing His <sub>10</sub> -Tne2-<br>VSV-G                              | This study                        |
|                              | $\Delta$ PFL_6099 His <sub>10</sub> -PFL_6209-<br>VSV-G                                        | <i>eagT2</i> deletion strain<br>expressing His <sub>10</sub> -Tne2-<br>VSV-G                              | This study                        |
|                              | $\Delta$ PFL_6095 His <sub>10</sub> -<br>PFL_6096_Δ2-74                                        | <i>eagR1</i> deletion strain<br>expressing His <sub>10</sub> -RhsA<br>lacking its N-terminal<br>TM region | This study                        |
|                              | $\Delta$ PFL_6081<br>PFL_6096_Δ2-74                                                            | <i>tssM</i> deletion strain<br>Expresses RhsA lacking<br>its N-terminal TM region                         | (Tang et al., 2018)<br>This study |
|                              | FLAG-PFL_6094 His <sub>10</sub> -<br>PFL_6096                                                  | Expresses VgrG1 with a<br>N-terminal FLAG tag<br>and His <sub>10</sub> -RhsA                              | This study                        |
|                              | FLAG-PFL_6094 His <sub>10</sub> -<br>PFL_6096_Δ2-74                                            | Expresses VgrG1 with a<br>N-terminal FLAG tag<br>and His <sub>10</sub> -RhsA <sub>ΔNT</sub>               | This study                        |
| <i>P. aeruginosa</i><br>PAO1 | $\Delta$ PA4856                                                                                | <i>retS</i> deletion strain                                                                               | (Goodman et al.,<br>2004)         |
|                              | $\Delta$ PA4856 $\Delta$ PA0091                                                                | <i>retS vgrG1a</i> deletion<br>strain                                                                     | (Whitney et al., 2014)            |
|                              | $\Delta$ PA4856 $\Delta$ PA0093                                                                | <i>retS tse6</i> deletion strains                                                                         | (Whitney et al., 2014)            |
|                              | $\Delta$ PA4856 $\Delta$ PA0094                                                                | <i>retS eagT6</i> deletion<br>strain                                                                      | (Whitney et al., 2015)            |

|                                     |                                                                                                                                                      |                                                                   |                      |
|-------------------------------------|------------------------------------------------------------------------------------------------------------------------------------------------------|-------------------------------------------------------------------|----------------------|
|                                     | $\Delta$ PA4856 PA0093_D11A                                                                                                                          | <i>retS</i> deletion strain expressing Tse6 <sup>D11A</sup>       | This study           |
|                                     | $\Delta$ PA4856 PA0093_H15A                                                                                                                          | <i>retS</i> deletion strain expressing Tse6 <sup>H15A</sup>       | This study           |
|                                     | $\Delta$ PA4856 PA0093_D11A_H15A                                                                                                                     | <i>retS</i> deletion strain expressing Tse6 <sup>D11A, H15A</sup> | This study           |
| <i>E. coli</i> SM10 $\lambda$ pir   | <i>thi thr leu tonA lac Y supE recA::RP4-2-Tc::Mu</i>                                                                                                | Conjugation strain                                                | BioMedal LifeScience |
| <i>E. coli</i> XL-1 Blue            | <i>recA1 endA1 gyrA96 thi-1 hsdR17 supE44 relA1 lac [F' proAB lacI<sup>s</sup> Z<math>\Delta</math>M15 Tn10 (Tet<sup>R</sup>)]</i>                   | Cloning strain                                                    | Novagen              |
| <i>E. coli</i> BL21 (DE3) CodonPlus | F <sup>-</sup> ompT gal dcm lon hsdS <sub>B</sub> (r <sub>B</sub> <sup>-</sup> m <sub>B</sub> <sup>-</sup> ) $\lambda$ (DE3) pLysS(cm <sup>R</sup> ) | Protein expression strain                                         | Novagen              |

1  
2



1 **Table 6: Plasmids used in this study.**

| Plasmid                                                            | Relevant features                                                                                                                       | Reference                   |
|--------------------------------------------------------------------|-----------------------------------------------------------------------------------------------------------------------------------------|-----------------------------|
| pETDuet-1                                                          | Co-expression vector with <i>lacI</i> , T7 promoter, N-terminal His <sub>6</sub> tag in MCS-1, Amp <sup>R</sup>                         | Novagen                     |
| pRSETA                                                             | Expression vector with <i>lacI</i> , T7 promoter, N-terminal His <sub>6</sub> tag and a HRV 3C protease cleavage site, Amp <sup>R</sup> | Life Technologies           |
| pET29b                                                             | Expression vector with <i>lacI</i> , T7 promoter, C-terminal His <sub>6</sub> tag, Kan <sup>R</sup>                                     | (Rietsch et al., 2005)      |
| pEXG2                                                              | Allelic replacement vector containing <i>sacB</i> , Gm <sup>R</sup>                                                                     | (Baynham et al., 2006)      |
| pSW196                                                             | MiniCTX1 plasmid, Tet <sup>R</sup>                                                                                                      | (Mougous et al., 2006)      |
| pSCrhaB2-CV                                                        | Expression vector with <i>PrhaB</i> , Tmp <sup>R</sup>                                                                                  | (Cardona and Valvano, 2005) |
| pPSV39-CV                                                          | Expression vector with <i>lacI</i> , <i>lacUV5</i> promoter, C-terminal VSV-G tag, Gm <sup>R</sup>                                      | This study                  |
| pSW196:: <i>lacZ</i>                                               | <i>lacZ</i> in miniCTX1 plasmid                                                                                                         | This study                  |
| pETDuet-1::His <sub>6</sub> -ECL_01567-FLAG ::ECL_01568            | Co-expression vector for N-terminal His <sub>6</sub> and C-terminal FLAG tagged RhsA and RhsI from <i>E. cloacae</i>                    | This study                  |
| pETDuet-1::His <sub>6</sub> -SF0266-FLAG                           | Expression vector for class I prePAAR effector SF0266 from <i>S. flexneri</i>                                                           | This study                  |
| pETDuet-1::His <sub>6</sub> -SL1344_0286-FLAG ::SL1344_0286a       | Co-expression vector for N-terminal His <sub>6</sub> and C-terminal FLAG tagged RhsI and untagged RhsI from <i>S. Typhimurium</i>       | This study                  |
| pETDuet-1::His <sub>6</sub> -PA0093-FLAG ::PA0092                  | Co-expression vector for N-terminal His <sub>6</sub> and C-terminal FLAG tagged Tse6 and Tsi6 from <i>P. aeruginosa</i>                 | This study                  |
| pETDuet-1::His <sub>6</sub> -Spro_3017-FLAG::Spro_3018             | Co-expression vector for N-terminal His <sub>6</sub> and C-terminal FLAG tagged Tre1 and Tri1 from <i>S. proteamaculans</i>             | This study                  |
| pETDuet-1::His <sub>6</sub> -PFL_6096::PFL_6097                    | Co-expression vector for N-terminal His <sub>6</sub> -tagged RhsA and RhsI from <i>P. protegens</i>                                     | This study                  |
| pETDuet-1::His <sub>6</sub> -PFL_6096_Δ2-74::PFL_6097              | Co-expression vector for N-terminal His <sub>6</sub> -tagged RhsA <sub>ΔNT</sub> and RhsI from <i>P. protegens</i>                      | This study                  |
| pETDuet-1::PA0093_1-61-His <sub>6</sub> ::PA0094-VSV-G             | Co-expression vector for C-terminal His <sub>6</sub> tagged Tse6 TMD1 and C-terminal VSV-G tagged EagT6                                 | This study                  |
| pETDuet-1::SL1344_0286_1-59-His <sub>6</sub> ::SL1344_0285-VSV-G   | Co-expression vector for C-terminal His <sub>6</sub> tagged Rhs1 TMD1 and C-terminal VSV-G tagged SciW                                  | (Vance et al., 2005)        |
| pETDuet-1::His <sub>6</sub> -PFL_6209::PFL_6210                    | Co-expression vector for N-terminal His <sub>6</sub> -tagged Tne2 and Tni2 from <i>P. protegens</i>                                     | This study                  |
| pETDuet-1::His <sub>6</sub> -SL1344_0286_Δ1-59-FLAG ::SL1344_0286a | Co-expression vector for N-terminal His <sub>6</sub> and C-terminal FLAG tagged Rhs1 <sub>ΔNT</sub> and RhsI from <i>S. Typhimurium</i> | This study                  |
| pETDuet-1::His <sub>6</sub> -PA0093::PA0092                        | Co-expression vector for N-terminal His <sub>6</sub> -tagged Tse6 and Tsi6 from <i>P. aeruginosa</i>                                    | This study                  |
| pETDuet-1::His <sub>6</sub> -PA0093_D11A::PA0092                   | Co-expression vector for N-terminal His <sub>6</sub> -tagged Tse6 <sup>D11A</sup> and Tsi6 from <i>P. aeruginosa</i>                    | (Quentin et al., 2018)      |
| pETDuet-1::His <sub>6</sub> -PA0093_H15A::PA0092                   | Co-expression vector for N-terminal His <sub>6</sub> -tagged Tse6 <sup>H15A</sup> and Tsi6 from <i>P. aeruginosa</i>                    | This study                  |

|                                                           |                                                                                                                                      |                |
|-----------------------------------------------------------|--------------------------------------------------------------------------------------------------------------------------------------|----------------|
| pETDuet-1::His <sub>6</sub> -PA0093_D11A_H15A::PA0092     | Co-expression vector for N-terminal His <sub>6</sub> -tagged Tse6 <sup>D11A, H15A</sup> and Tsi6 from <i>P. aeruginosa</i>           | This study     |
| pETDuet-1::FLAG-PA0091                                    | Expression vector for N-terminal FLAG tagged VgrG1 from <i>P. aeruginosa</i>                                                         | This study     |
| pETDuet-1::PFL_6096_1-74-VSV-G::PFL_6095-His <sub>6</sub> | Expression vector for C-terminal VSV-G tagged RhsANT and N-terminal His <sub>6</sub> -tagged EagR1                                   | This study     |
| pRSETA::SL1344_0285                                       | Expression vector for SciW (for crystallization)                                                                                     | This study     |
| pET29b::ECL_01566-VSV-G                                   | Expression vector for C-terminal VSV-G tagged EagR <sub>A</sub> from <i>E. cloacae</i>                                               | This study     |
| pET29b::SF0260a-VSV-G                                     | Expression vector for C-terminal VSV-G tagged SF0260a (Eag) from <i>S. flexneri</i>                                                  | This study     |
| pET29b::SL1344_0285-VSV-G                                 | Expression vector for C-terminal VSV-G tagged SciW from <i>S. Typhimurium</i>                                                        | Quentin et al. |
| pET29b::PA0094-VSV-G                                      | Expression vector for C-terminal VSV-G tagged EagT6 from <i>P. aeruginosa</i>                                                        | This study     |
| pET29b::Spro_3016-VSV-G                                   | Expression vector for C-terminal VSV-G tagged EagT6 from <i>S. proteamaculans</i>                                                    | This study     |
| pET29b::PFL_6095-VSV-G                                    | Expression vector for C-terminal VSV-G tagged EagR1 from <i>P. protegens</i>                                                         | This study     |
| pET29b::PFL_6099-VSV-G                                    | Expression vector for C-terminal VSV-G tagged EagT2 from <i>P. protegens</i>                                                         | This study     |
| pET29b::FLAG-PFL_6094                                     | Expression vector for N-terminal FLAG tagged VgrG1 from <i>P. protegens</i>                                                          | This study     |
| pET29b::PA0093_75-162-FLAG                                | Expression vector for C-terminal FLAG tagged PAAR domain of Tse6                                                                     | This study     |
| pEXG2::ΔPFL_6095                                          | <i>eagR1</i> deletion construct                                                                                                      | This study     |
| pEXG2::ΔPFL_6099                                          | <i>eagT2</i> deletion construct                                                                                                      | This study     |
| pEXG2::ΔPFL_6209                                          | <i>tne2</i> deletion construct                                                                                                       | This study     |
| pEXG2::ΔPFL_6096                                          | <i>rhsA</i> deletion construct                                                                                                       | This study     |
| pEXG2::ΔPFL_6079                                          | <i>pppA</i> deletion construct                                                                                                       | This study     |
| pEXG2::ΔPFL_6096 ΔPFL_6097                                | <i>rhsA-rhsI</i> effector-immunity pair deletion construct                                                                           | This study     |
| pEXG2::ΔPFL_6209 ΔPFL_6210                                | <i>tne2-tni2</i> effector-immunity pair deletion construct                                                                           | This study     |
| pEXG2::ΔPFL_6094                                          | <i>vgrG1</i> deletion construct                                                                                                      | This study     |
| pEXG2::His <sub>10</sub> -PFL_6096                        | N-terminal His <sub>10</sub> - <i>rhsA</i> fusion construct                                                                          | This study     |
| pEXG2::His <sub>10</sub> -PFL_6096*                       | N-terminal His <sub>10</sub> - <i>rhsA</i> fusion construct compatible with a strain lacking <i>eagR1</i>                            | This study     |
| pEXG2::FLAG-PFL_6094                                      | N-terminal FLAG- <i>vgrG1</i> fusion construct                                                                                       | This study     |
| pEXG2::His <sub>10</sub> -PFL_6209                        | N-terminal His <sub>10</sub> - <i>tne2</i> fusion construct                                                                          | This study     |
| pEXG2::PFL_6209-VSV-G                                     | VSV-G                                                                                                                                | This study     |
| pEXG2::PFL_6096_Δ2-74                                     | RhsA NT deletion construct                                                                                                           | This study     |
| pEXG2::His <sub>10</sub> -PFL_6096_Δ2-74                  | RhsA NT deletion construct compatible in a strain with an N-terminal His <sub>10</sub> - <i>rhsA</i> fusion                          | This study     |
| pEXG2::His <sub>10</sub> -PFL_6096_Δ2-74*                 | RhsA NT deletion construct compatible in a strain with an N-terminal His <sub>10</sub> - <i>rhsA</i> fusion and lacking <i>eagR1</i> | This study     |
| pEXG2::PA0093_D11A                                        | Allelic exchange plasmid used to generate <i>tse6</i> <sup>D11A</sup> in <i>P. aeruginosa</i>                                        | This study     |
| pEXG2::PA0093_H15A                                        | Allelic exchange construct used to generate the <i>tse6</i> <sup>H15A</sup> point mutation in <i>P. aeruginosa</i>                   | This study     |
| pEXG2::PA0093_D11A_H15A                                   | Allelic exchange plasmid used to generate <i>tse6</i> <sup>D11, H15A</sup> in <i>P. aeruginosa</i>                                   | This study     |

|   |                                   |                                                             |            |
|---|-----------------------------------|-------------------------------------------------------------|------------|
|   | pSCrhaB2-V::PFL_6096_D1404A       | Expression vector for RhsA <sup>D1404A</sup>                | This study |
| 1 | pSCrhaB2-V::PFL_6096_Δ2-74_D1404A | Expression vector for RhsA <sub>ΔNT</sub> <sup>D1404A</sup> | This study |
| 2 |                                   |                                                             |            |

## 1 Supplementary figures

2  
3 **Figure 1—figure supplement 1 | prePAAR effectors contain a fixed number of**  
4 **transmembrane domains.** A) Phylogenetic distribution of 975 prePAAR-containing  
5 proteins identified in the UniProtKB database using the N-terminus of Tse6 (Tse6<sub>NT</sub>) as a  
6 search query (see methods). The TM helix predictors TMHMM and Phobius (Krogh et  
7 al., 2001, Kall et al., 2007) were used to quantify the number of TMDs in each protein  
8 (green, 1 TMD; blue, 2 TMDs). B) Similar analysis as Figure 1E, except that only  
9 prePAAR-containing effectors with an adjacent *eag* gene are depicted (left). The  
10 adjacently encoded *eag* chaperone sequences for each prePAAR effector were then used  
11 to build a second tree to depicting their distribution and association with an effector class  
12 (right). The *eag* chaperones were labelled with their neighbouring effector's TMD  
13 prediction. All branch length represents evolutionary distance. C) Genomic arrangement  
14 of the five chaperone-effector pairs used for the co-purification experiment shown in  
15 Figure 1G. Shading was used to differentiate effector (dark) from potential immunity  
16 (light) genes. Locus tags and previously established names for each open reading frame  
17 are indicated above and below the gene diagram, respectively. Scale bar indicates 1  
18 kilobase pair.

19  
20 **Figure 2—figure supplement 1 | The type VI secretion system of *P. protegens* Pf-5 is**  
21 **repressed by the threonine phosphorylation pathway.** A) Western blot of supernatant  
22 (sup) and cell fractions of the indicated *P. protegens* Pf-5 strains grown to OD 0.8. An  
23 Hcp (PFL\_6089)-specific antibody was used to assess T6SS activity. B) Intraspecific  
24 growth competition assay of the indicated donor *P. protegens* strains against a recipient  
25 susceptible to intoxication by the class I prePAAR effector RhsA. Data are mean  $\pm$ s.d. for  
26  $n = 3$  biological replicates;  $P$  value shown is from a two-tailed, unpaired  $t$ -test.

27  
28 **Figure 3—figure supplement 1 | RhsA interacts with EagR1 and requires VgrG1 for**  
29 **delivery into target cells.** A and B) Growth competition assays between the indicated *P.*  
30 *protegens* donor strains and either Tne2 (A) or RhsA (B) susceptible recipients. C)  
31 Western blot of lysate and pull-down elution fractions of His<sub>6</sub>-tagged EagR1 co-  
32 expressed with an empty vector or RhsA<sub>NT</sub>-VSV-G (residues 1-74) in *E. coli*. D) Growth  
33 of *E. coli* co-expressing inducible plasmids harboring RhsA and EagR1 or RhsA<sub>ΔNT</sub> with  
34 an empty vector. Overnight cultures were plated on media containing (+) or lacking (-)  
35 inducers and were imaged after 24h of growth. E) Competition assay of the indicated *P.*  
36 *protegens* donor strains against a recipient susceptible to RhsA. F) Affinity pull-down of  
37 His<sub>6</sub>-tagged RhsA or RhsA<sub>ΔNT</sub> co-expressed with VgrG-FLAG and EagR1-VSV-G in *E.*  
38 *coli*. Samples were analysed by western blot using the indicated antibodies. G) Western  
39 blot of affinity pull-down elution fractions of His<sub>6</sub>-tagged Rhs1 or Rhs1<sub>ΔNT</sub> co-expressed  
40 with VSV-G tagged SciW. A-B, E) Data are mean  $\pm$ s.d. for  $n = 3$  biological replicates;  $P$   
41 values shown are from a two-tailed, unpaired  $t$ -test. C-D, F-G) Data are representative of  
42 two independent experiments.

43  
44 **Figure 4—figure supplement 1 | RhsA, EagR1 and VgrG1 form a ternary complex**  
45 **in vitro.** Unprocessed micrographs (A, C, E, G) and representative 2-D class averages (B,  
46 D, F, H) of negatively stained VgrG1 (A, B), RhsA<sub>ΔNT</sub> (C, D), EagR1-RhsA complex (E,

1 F) and EagR1-RhsA-VgrG1 complex (G, H). Scale bar represents 20 nm for unprocessed  
2 micrographs and 10 nm for class averages.

3  
4  
5 **Figure 5—figure supplement 1 | Structural comparison of Eag chaperones and**  
6 **effector complexes** A) Structural comparison of apo-SciW and apo-EagT6. Two views are  
7 shown related by an  $\sim 90^\circ$  rotation. Each chaperone is colored by chain as in Figure 4. B)  
8 Conserved surface residues as determined by the ConSurf server. The view is a  $180^\circ$   
9 rotation of panel A from Figure 4. The domain-swap created by the beta-strands from chain  
10 A and chain B are labeled and shown with yellow bar overlays. C) Electrostatic surface  
11 potential of apo-SciW. The back (left, same surface as panel B) and Rhs1 binding surfaces  
12 (right) are shown. D) Electrostatic surface potential of apo-SciW. The convex (left, same  
13 surface as panel B) and concave (Tse6 binding) surfaces (right) are shown. E) Structural  
14 overlay of the four SciW-Rhs1<sub>NT</sub> complexes in the asymmetric unit of the crystal structure.  
15 The modeled prePAAR and C-terminus of Rhs1 are indicated and colored by chain. F)  
16 View of the Rhs1 prePAAR region of each complex in the crystal structure. The N-terminal  
17 residue for each chain is listed. G) Electron density maps of SciW-Rhs1<sub>NT</sub> Chain C and  
18 Chain G contoured at 1.4 rmsd ( $0.6816e/\text{\AA}^3$ ). H) Structural overlay of the three EagT6-  
19 Tse6<sub>NT</sub> complexes in the asymmetric unit of the crystal structure. The modeled prePAAR  
20 and C-terminus of Tse6 are indicated and colored by chain. I) Electron density maps of  
21 EagT6-Tse6<sub>NT</sub> Chain C and Chain I contoured at 1.2 rmsd ( $0.0344e/\text{\AA}^3$ ). The prePAAR  
22 and modelled C-terminal helix of the TMD region are labeled. A crystal packing artefact  
23 from Chain E including residue R96 that locks the prePAAR-TMD into place is shown.  
24 Electrostatic surface potentials were calculated by the adaptive-Poisson-Boltzmann server.  
25 Potentials are colored from -5 to 5 kT/e at pH 7.0. Images were created using UCSF  
26 Chimera, Coot, and Pymol.

27  
28 **Figure 6—figure supplement 1 | The PAAR domain of prePAAR effectors lacks a**  
29 **critical N-terminal segment.** A) Surface representation of structural models of the  
30 PAAR domain from each of the indicated prePAAR effector proteins (purple) overlaid  
31 with a ribbon representation of the c1882 PAAR protein crystal structure (beige).  
32 Structural alignments were performed using ChimeraX. B) Structural overlay of the  
33 prePAAR segment (peach) from the artificially fused Tse6<sub>prePAAR+PAAR</sub> sequence in  
34 Figure 6D with the entire c1882 PAAR protein (blue). The zoom shows the Zn<sup>2+</sup>-  
35 coordinating residues of c1882 and the overlap of H15 from Tse6's prePAAR with H14  
36 of c1882. C) Sequence logos developed from multiple sequence alignments of 564  
37 orphan PAAR sequences and the N-terminus of 1,765 prePAAR-containing effectors.  
38 Sequence logos were developed for different regions (r1, r2, r3) in each construct that  
39 were contained for Zn<sup>2+</sup>-coordinating residues histidine and cysteine. D) Same samples  
40 from Figure 6A, except samples were boiled before being subject to electrophoresis. E)  
41 Same samples from 6G, except samples were boiled before being subject to  
42 electrophoresis.

43



## Figure 1

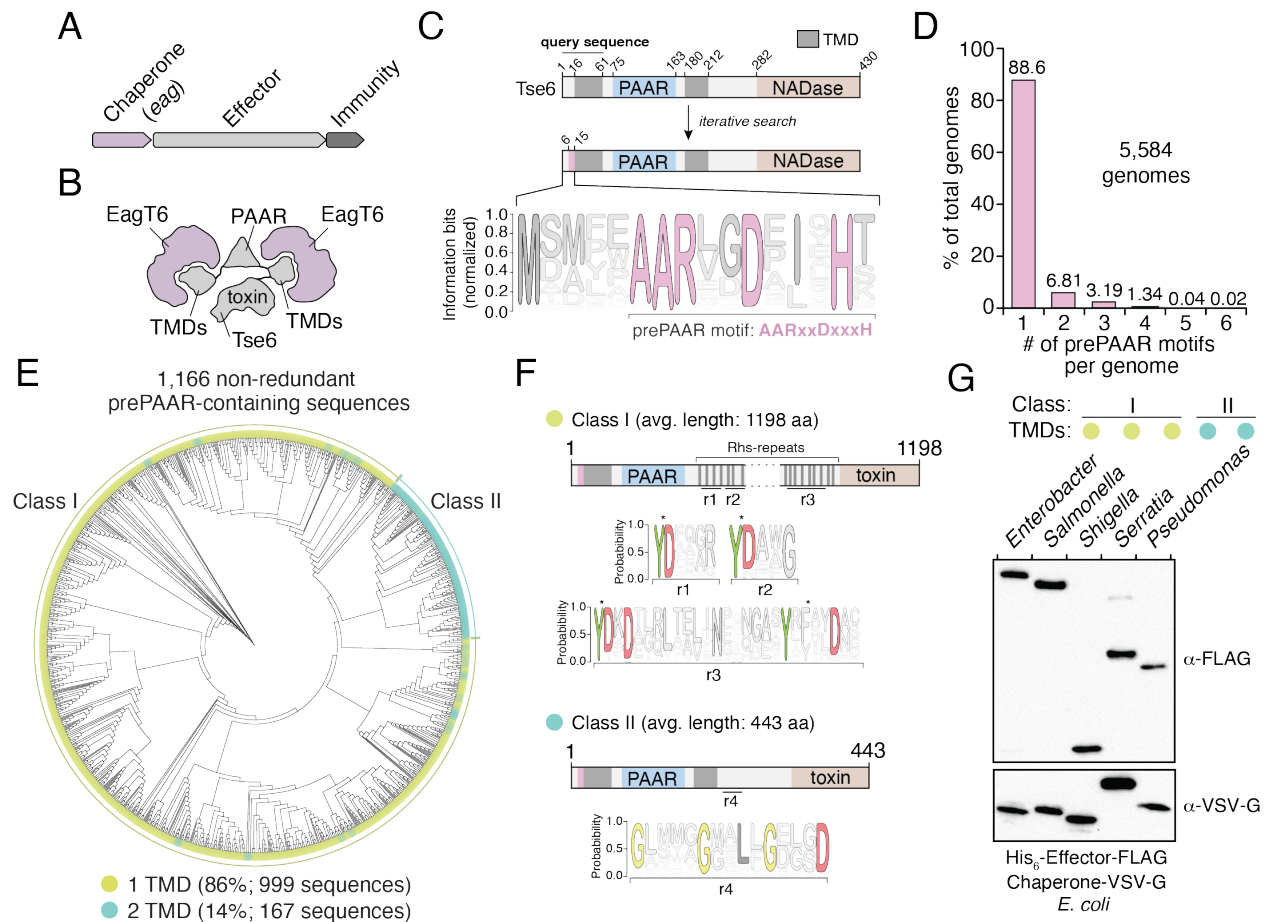

## Figure 2

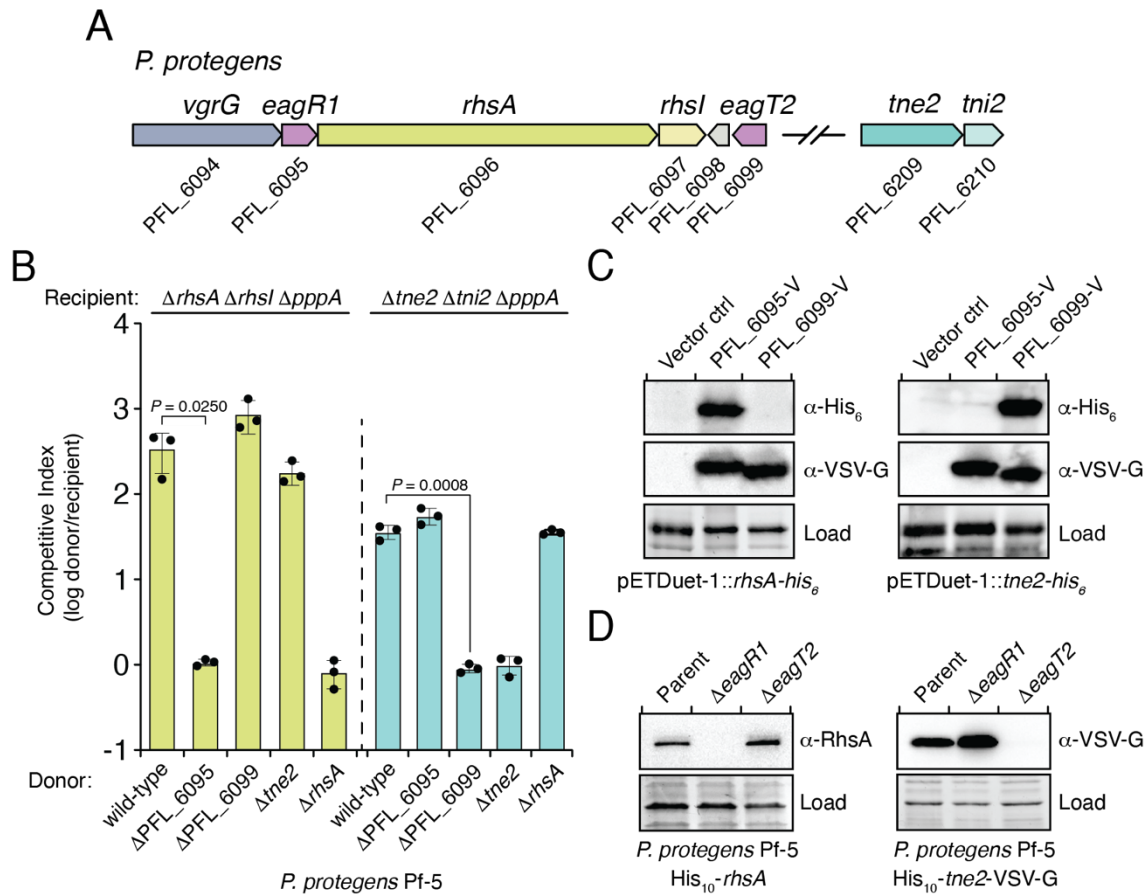

## Figure 3

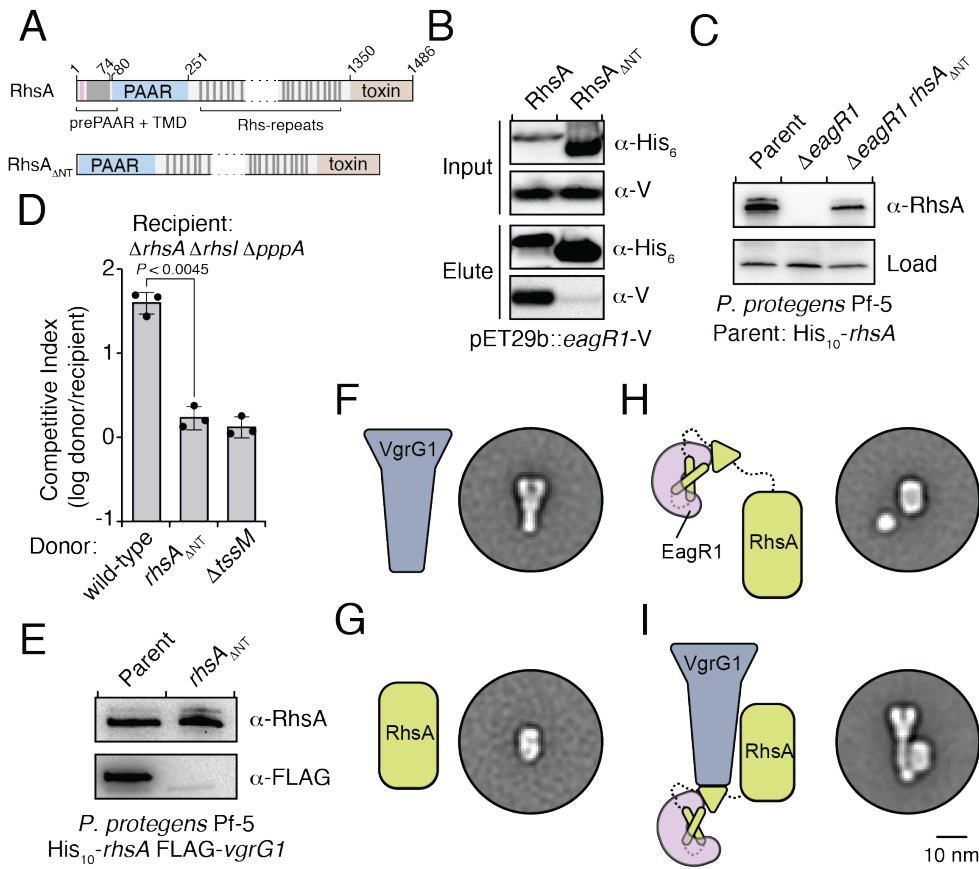

Figure 4

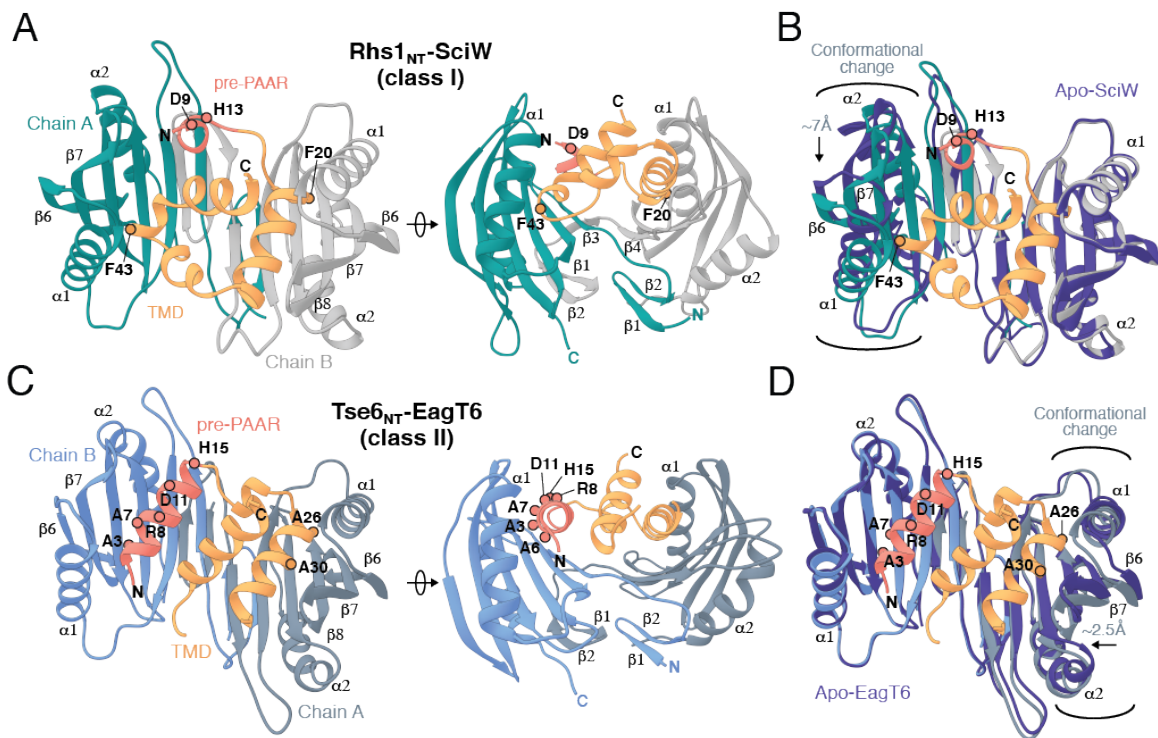

Figure 5

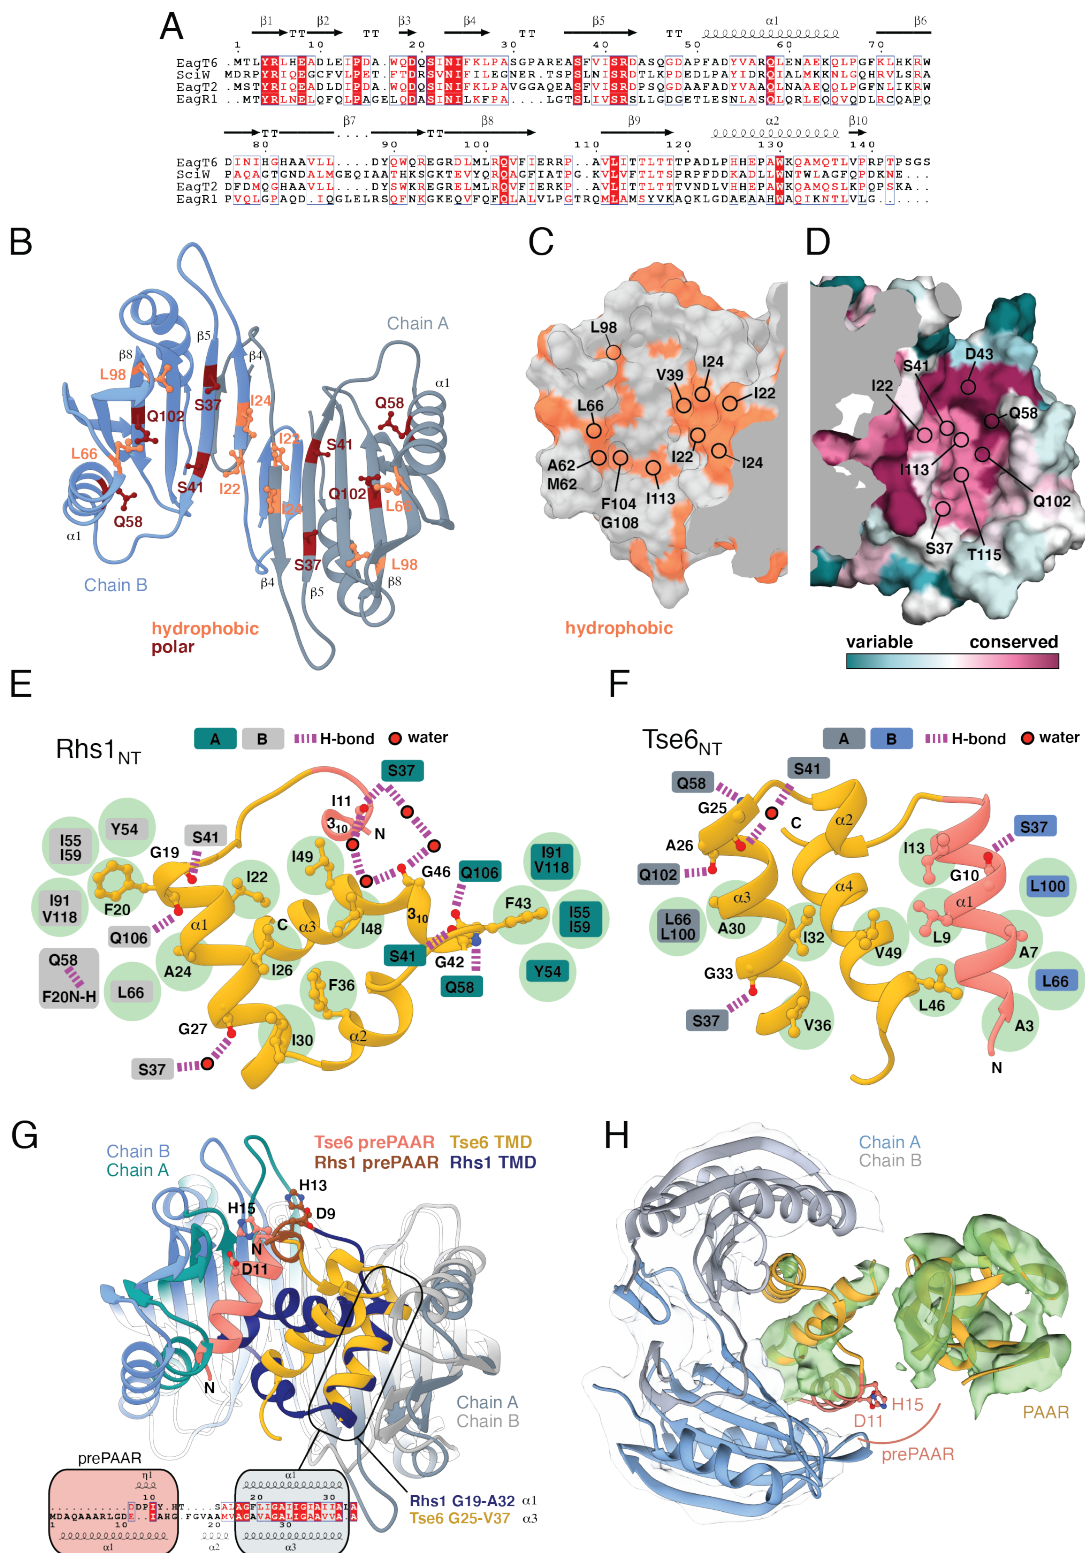



## Figure 6

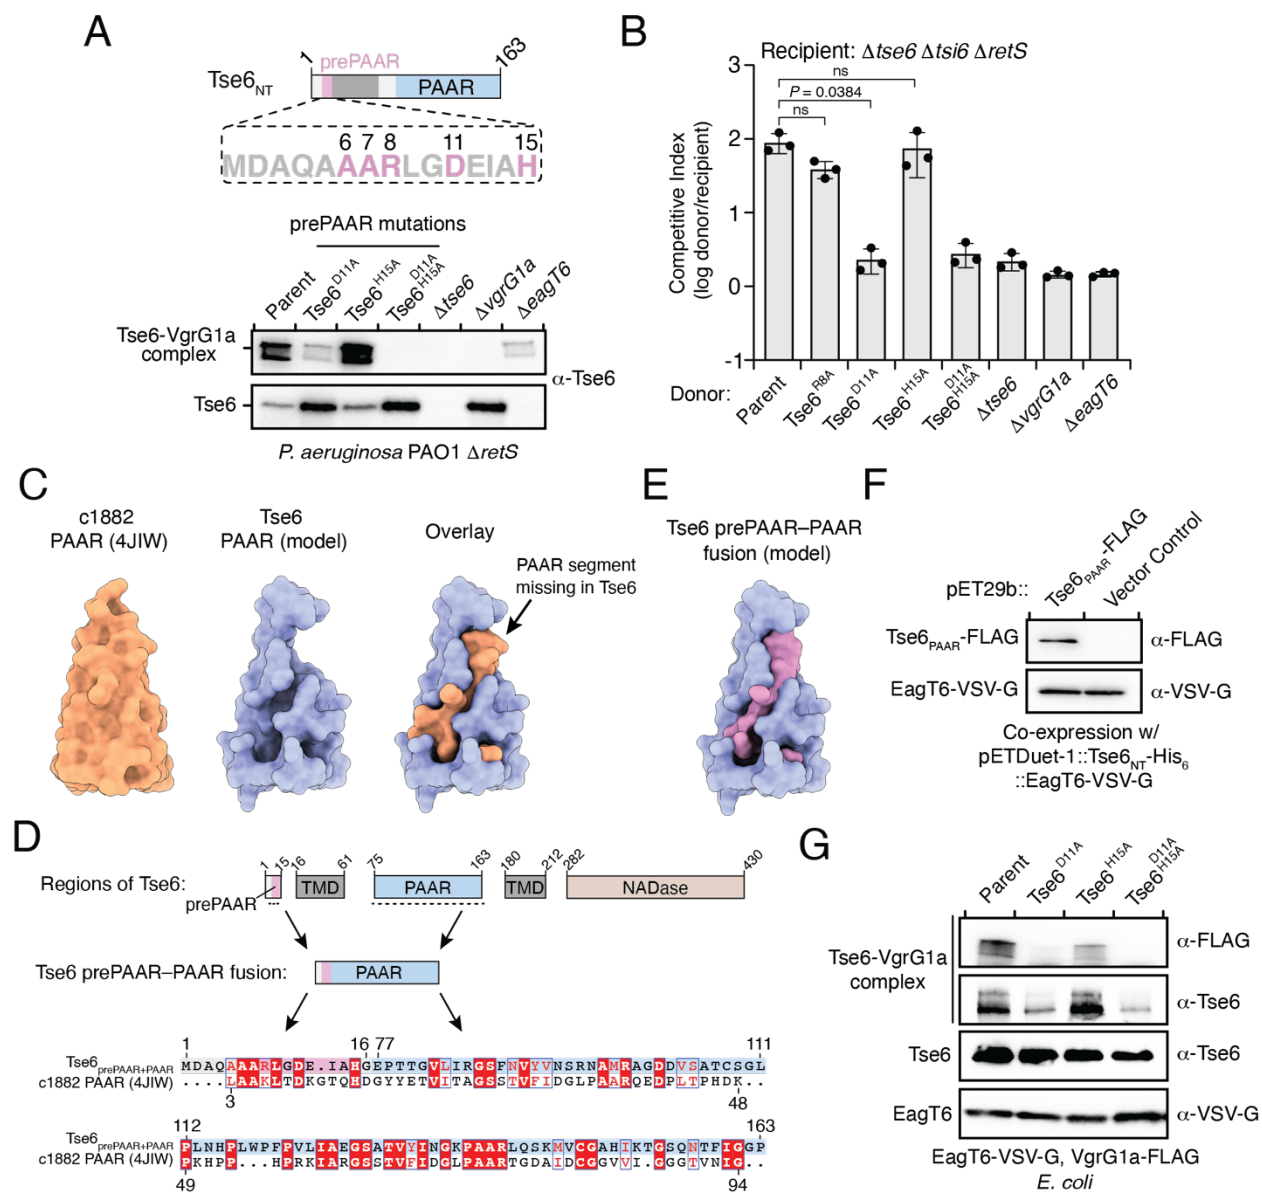

## Figure 7

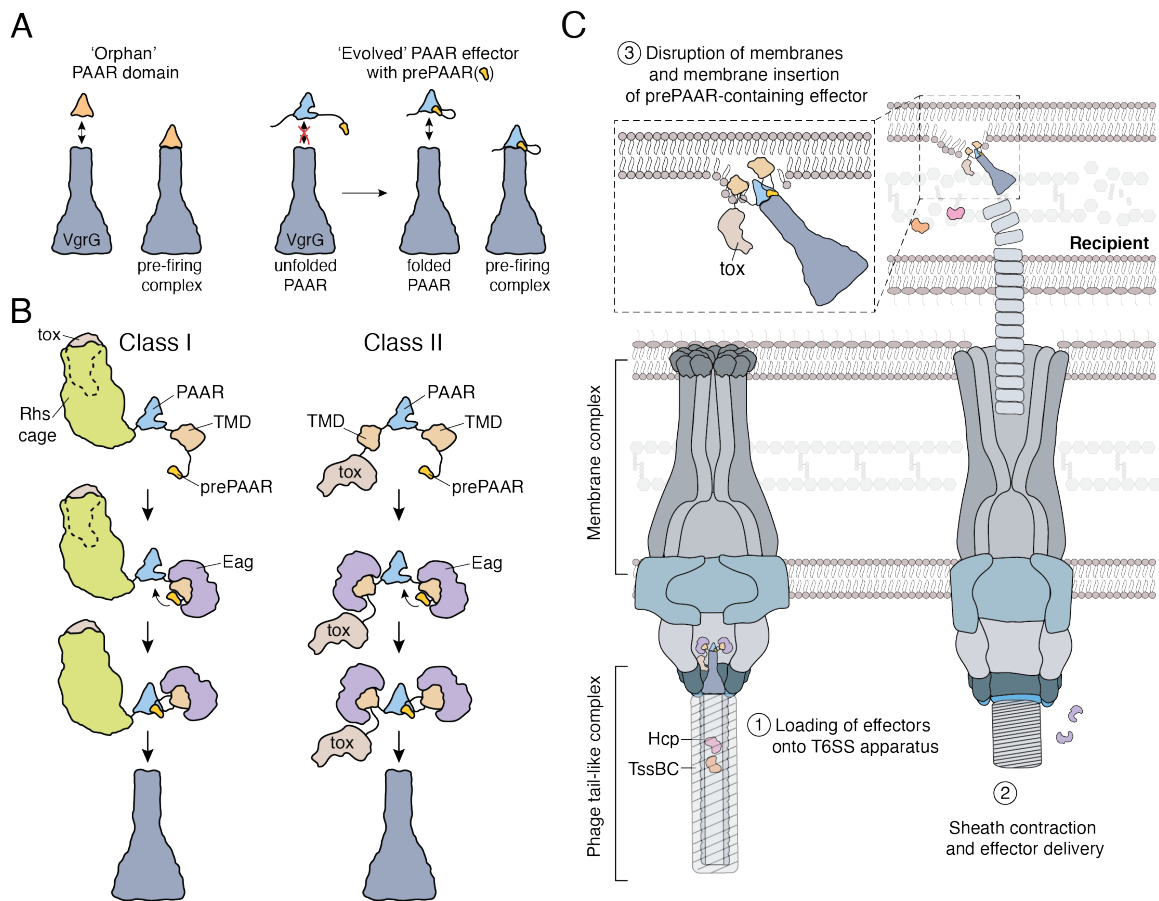

## Figure 1 —figure supplement 1

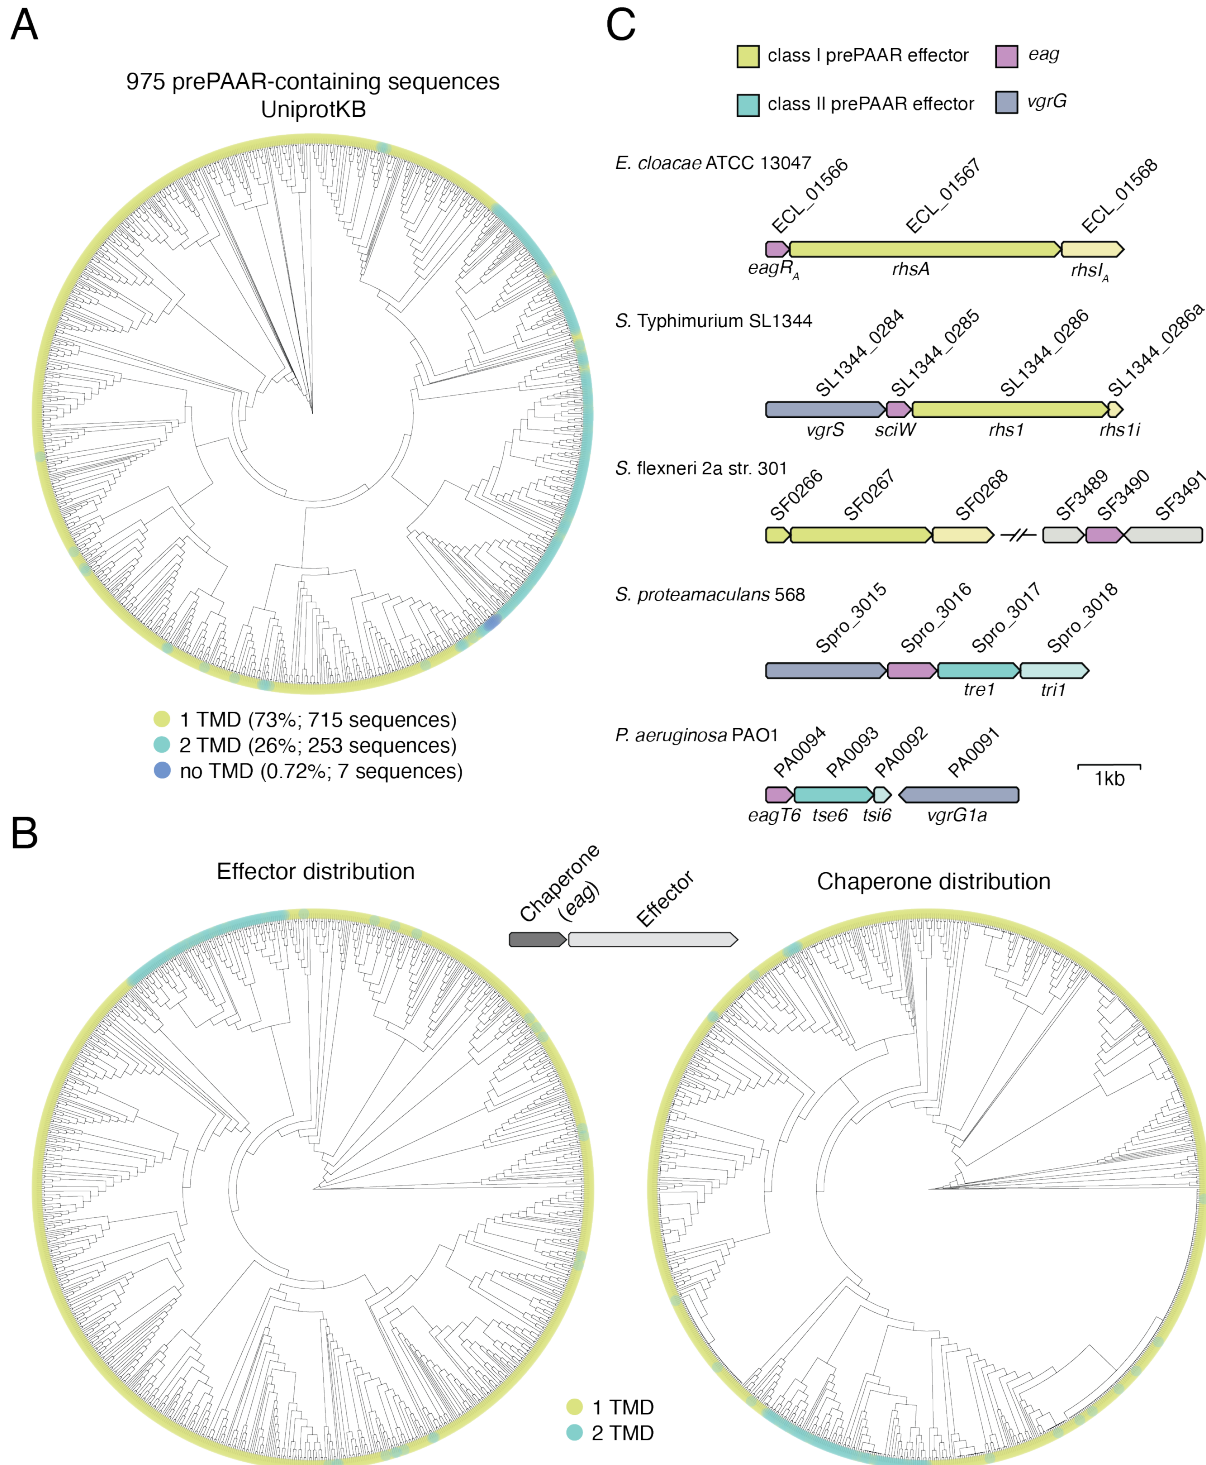

## Figure 2—figure supplement 1

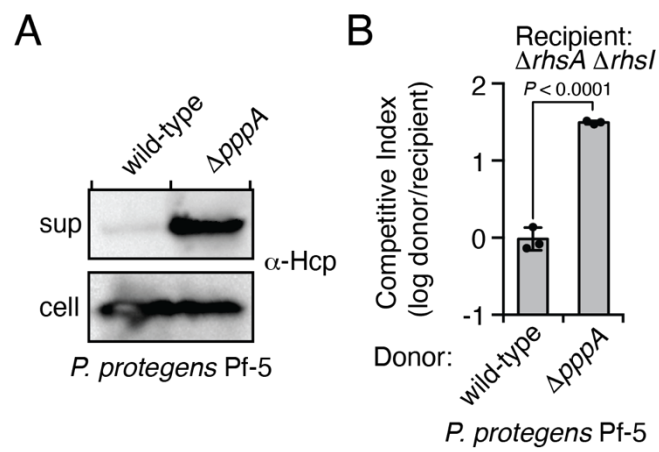

## Figure 3—figure supplement 1

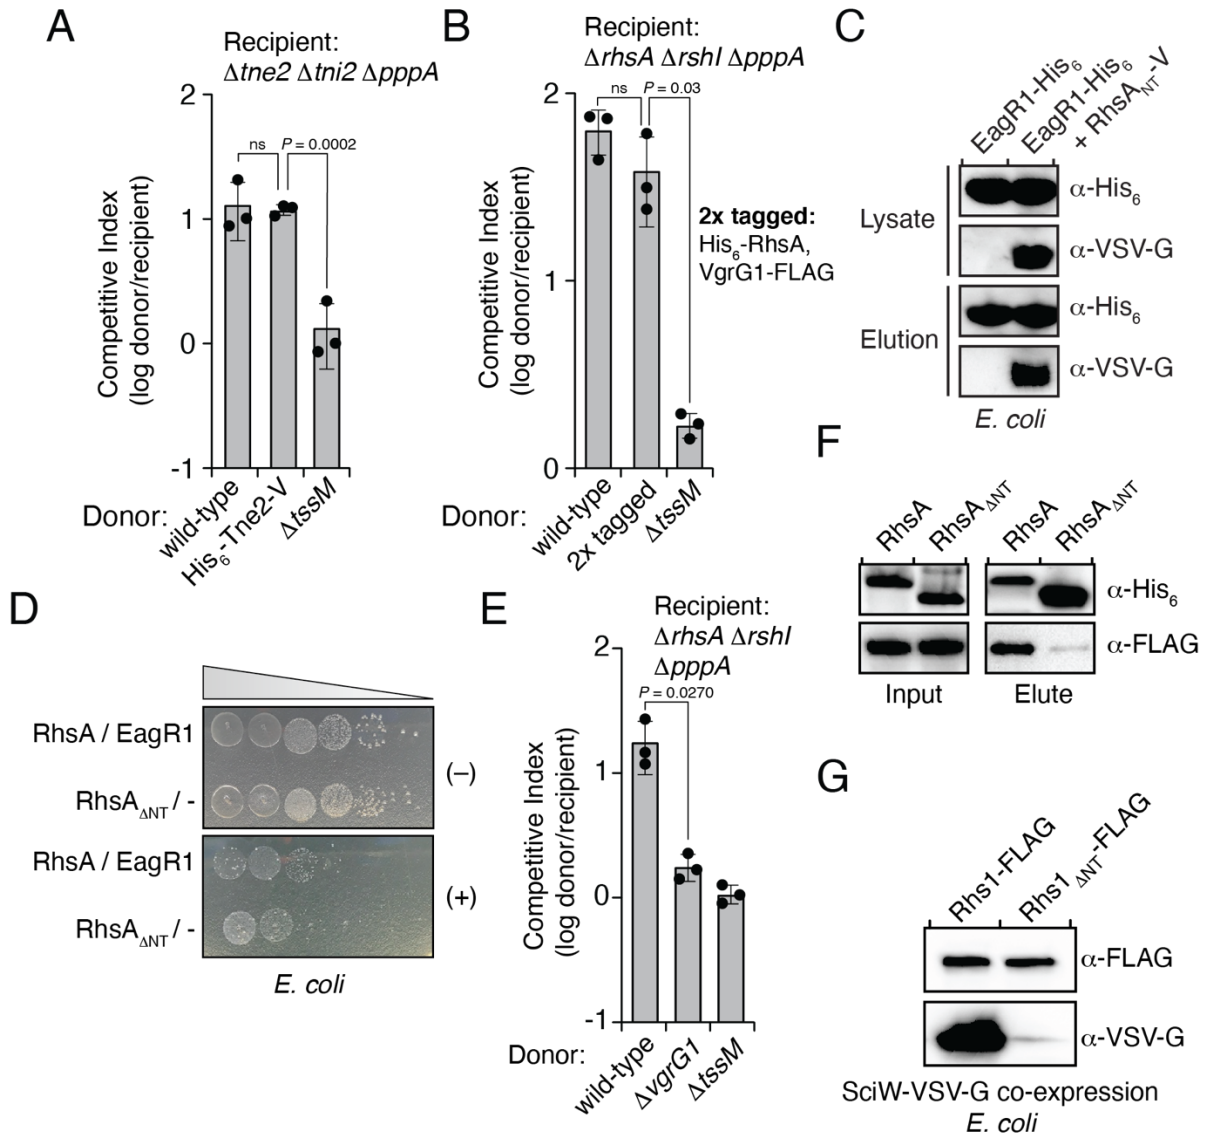

## Figure 4—figure supplement 1

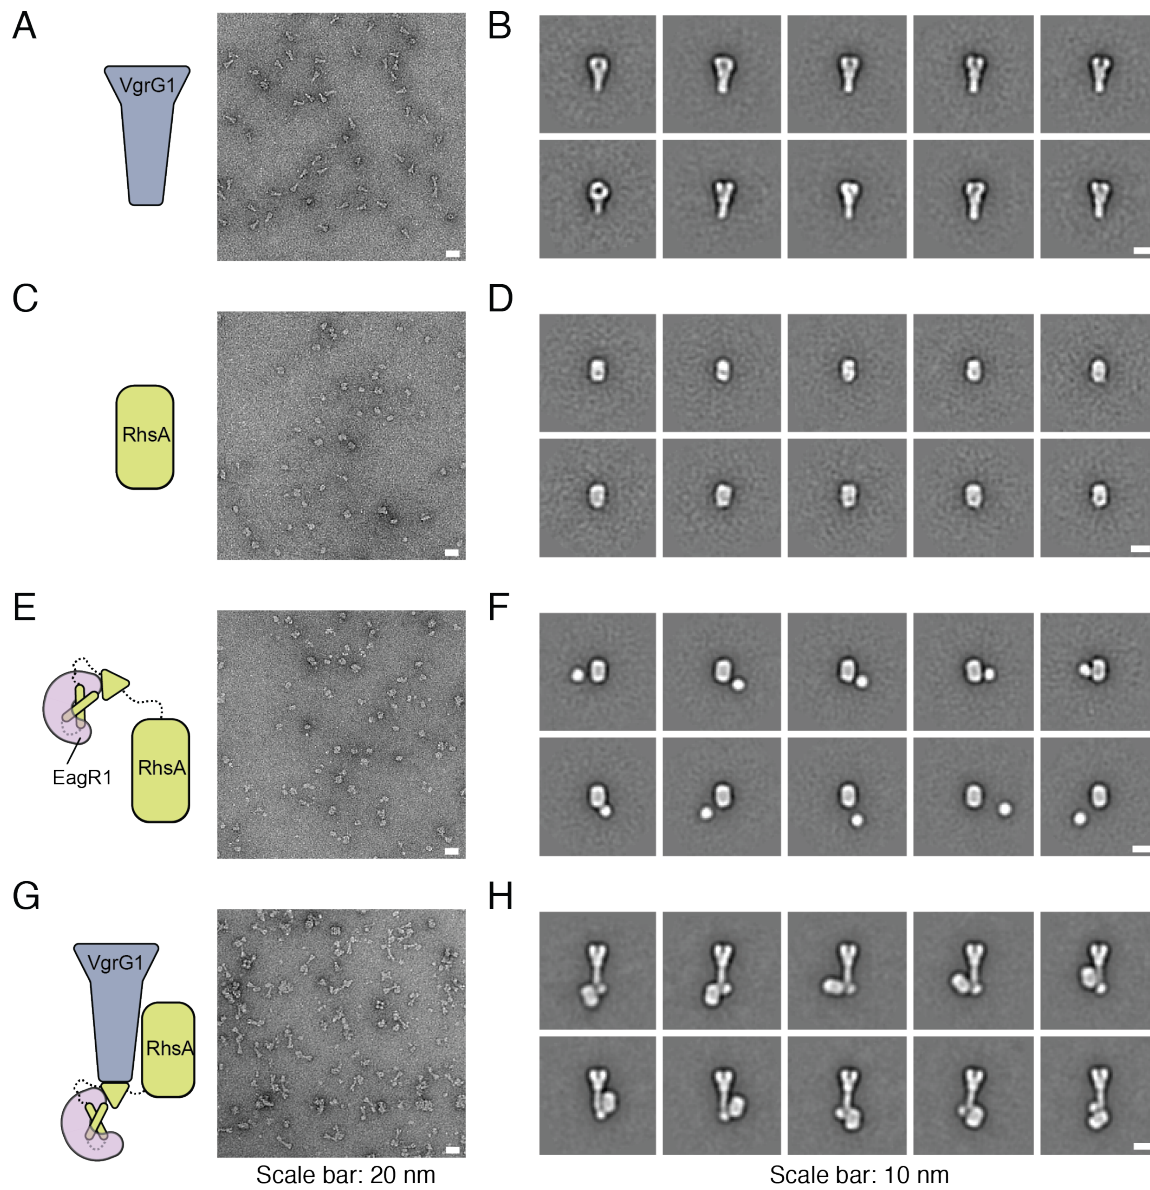



## Figure 5—figure supplement 1

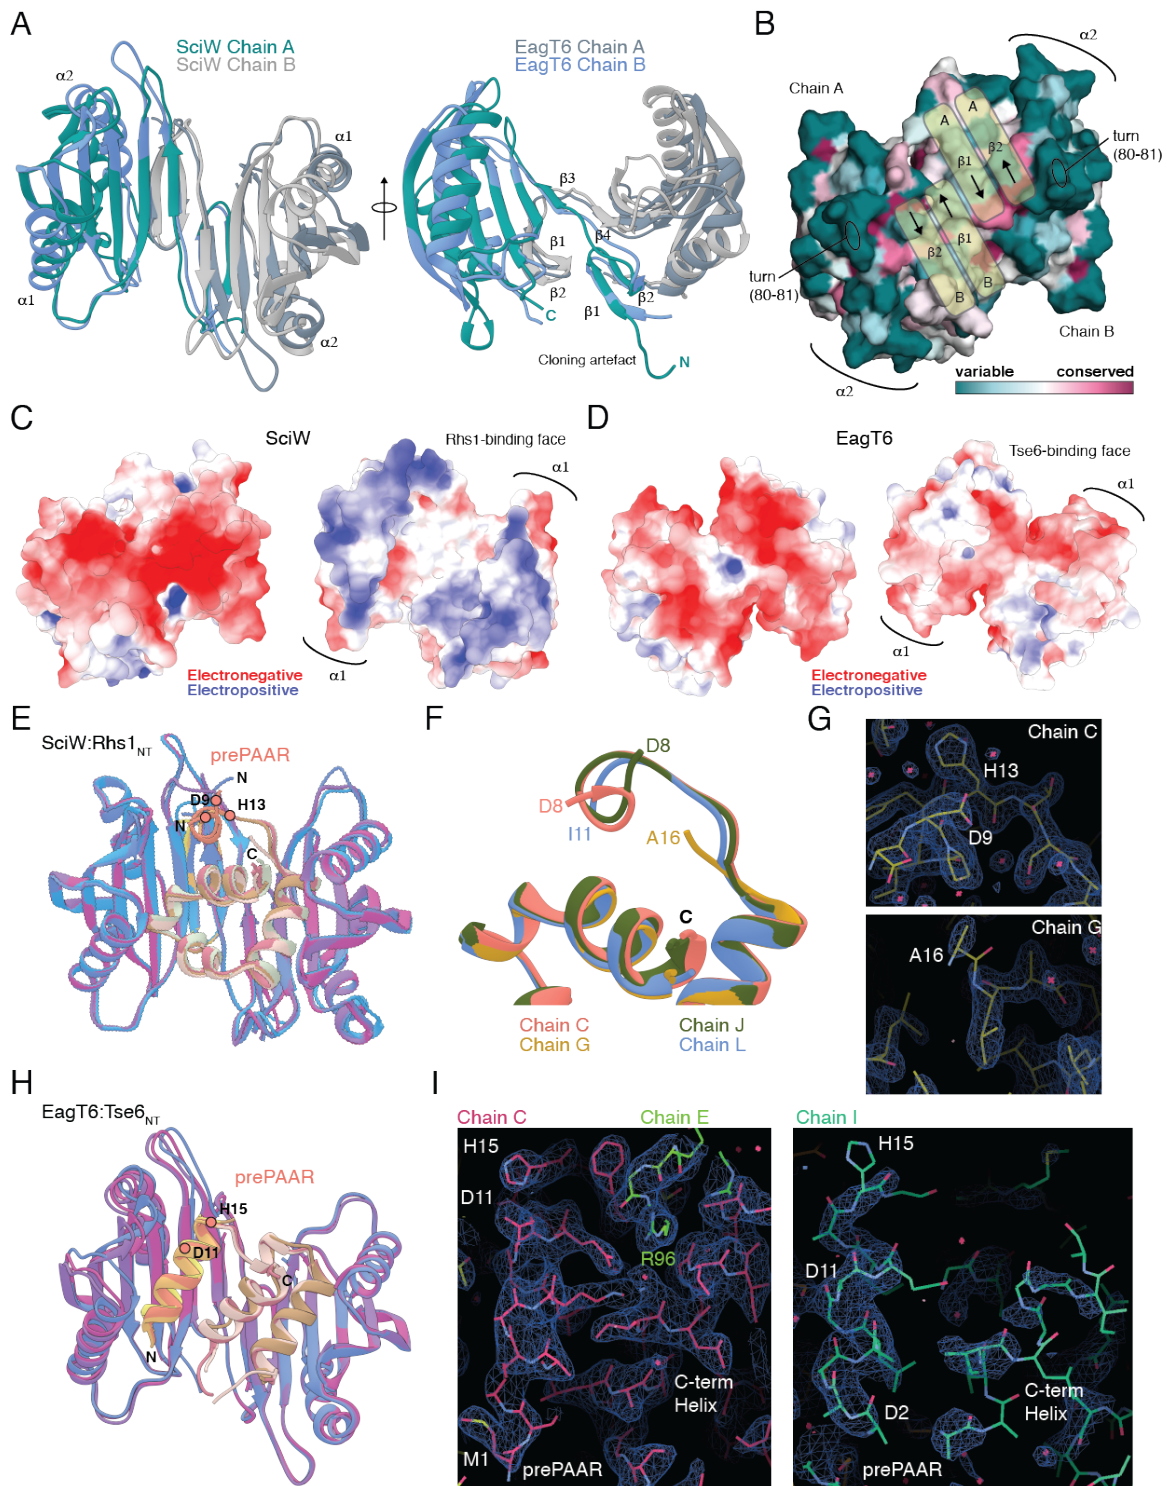

## Figure 6—figure supplement 1

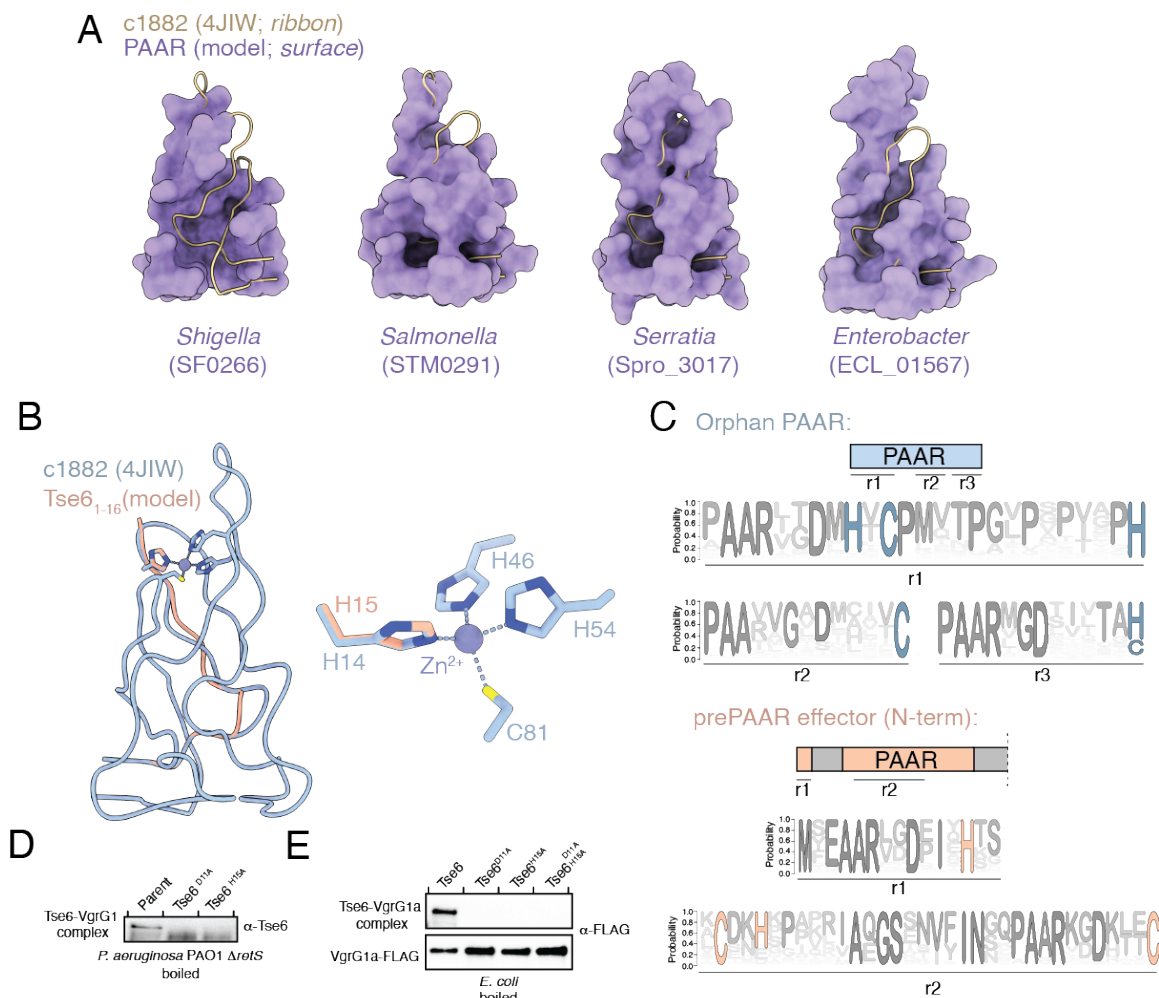

Source: https://www.biorxiv.org/content/10.1101/2020.10.28.356139v1.full.pdf
